# Supplementary material for: Chemical Distance Measurement and System Pharmacology Approach Uncover the Novel Protective Effects of Biotransformed Ginsenoside C‐Mc against UVB‐Irradiated Photoaging
Source: Hindawi journal article supplement (doi:10.1155/2022/4691576), 2022-01-01
Supplement: f1 [file 4691576.f1.pdf]

## Supplementary materials

# Chemical Distance Measurement and Systems Pharmacology Approach Uncover the Novel Protective Effects of Bio-transformed Ginsenoside C-Mc Against UVB- Irradiated Photoaging

Xiao-yi Liu<sup>1,2,3</sup>, Hui Li<sup>1</sup>, Eunson Hwang<sup>3</sup>, Bom Park<sup>3</sup>, Yong-kun Xiao<sup>3</sup>, Senmiao Liu<sup>2</sup>,  
Jiansong Fang<sup>4</sup>, Yeon-Ju Kim<sup>3\*</sup>, Tae-Hoo Yi<sup>3\*</sup>, Chuipu Cai<sup>2,4\*</sup>

<sup>1</sup>School of Basic Medical Sciences, Guangzhou University of Chinese Medicine, Guangzhou, China.

<sup>2</sup>Division of Data Intelligence, Department of Computer Science, Key Laboratory of Intelligent Manufacturing Technology of Ministry of Education, College of Engineering, Shantou University, Shantou, China.

<sup>3</sup>Department of Oriental Medicinal Biotechnology, College of Life Sciences, Kyung Hee University, Republic of Korea.

<sup>4</sup>Science and Technology Innovation Center, Guangzhou University of Chinese Medicine, Guangzhou, China.

### \*Correspondence:

Chuipu Cai, [chpcai@stu.edu.cn](mailto:chpcai@stu.edu.cn);

Yeon-Ju Kim, [yeonjukim@khu.ac.kr](mailto:yeonjukim@khu.ac.kr);

Tae-Hoo Yi, [drhoo@khu.ac.kr](mailto:drhoo@khu.ac.kr).

## Figures

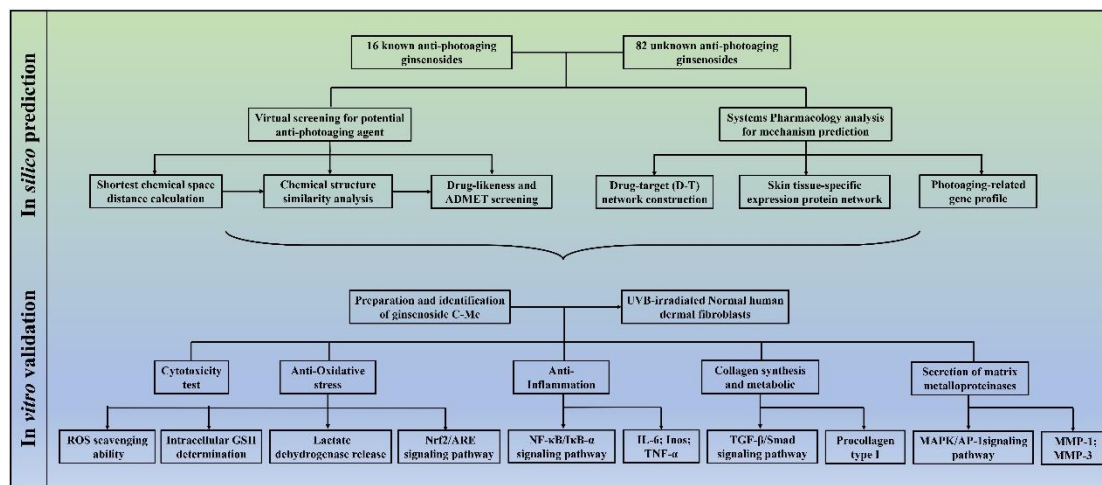

Figure S1. Overall workflow of this study.

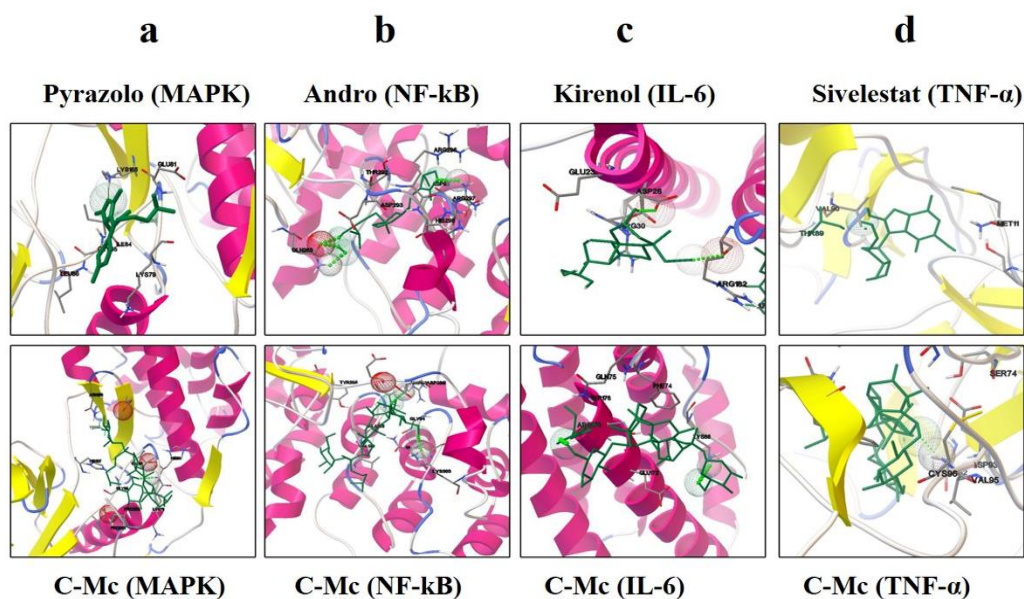

**Figure S2. Molecular docking mode of the complex 3D structure.** (a) Docking interaction of MAPK with Pyrazolo and C-Mc. (b) Docking interaction of NF-κB with Andro and C-Mc. (c) Docking interaction of IL-6 with Kirenol and C-Mc. (d) Docking interaction of TNF-α with Sivelestat and C-Mc. The 3D structures were optimized in ChemBioOffice 2010 tool package (PerkinElmer Inc.) and the molecular docking simulation was carried by Autodock v4.2 according to the available standard autodock protocol. The reaction conditions were optimized using the control ligand molecules and the lowest binding energy of the target was calculated using Lamarckian Genetic Algorithm (LGA).

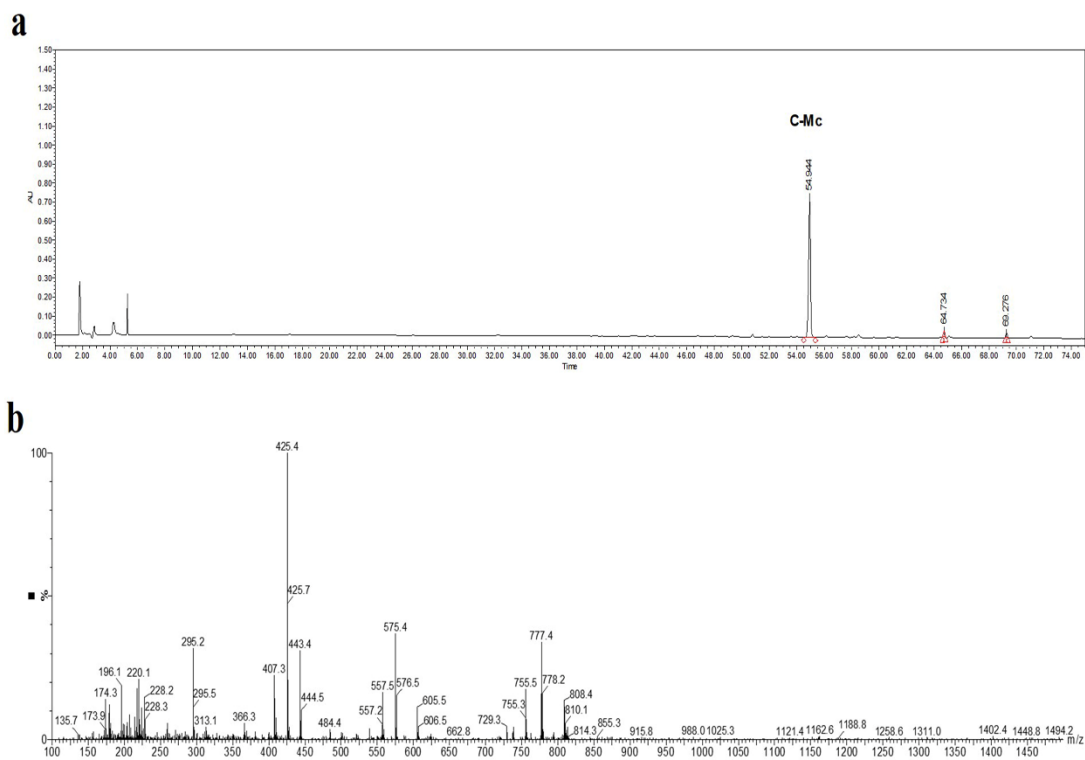

**Figure S3. Chromatographic analysis of ginsenoside C-Mc. (a) HPLC analysis of ginsenoside C-Mc; (b) Mass chromatograms analysis of ginsenoside C-Mc.**

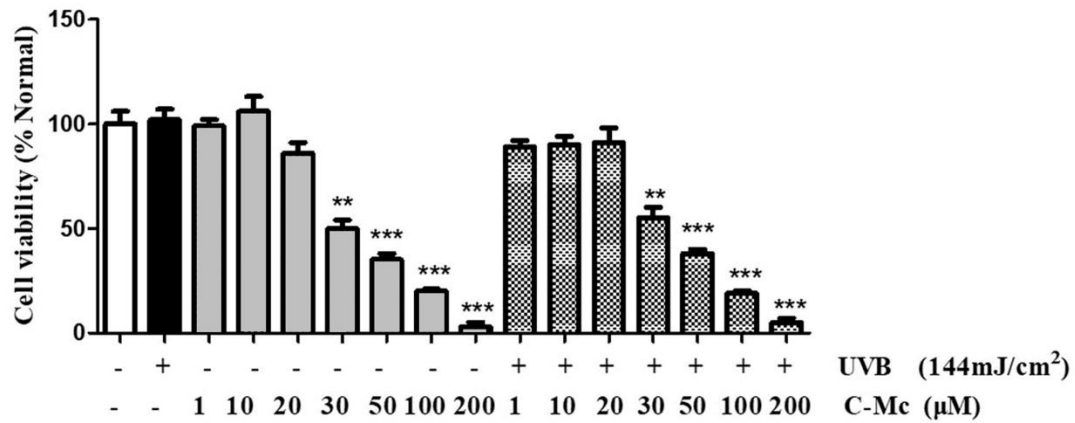

**Figure S4. Cell viability of ginsenoside C-Mc.** NHDFs were irradiated or non-irradiated with 144 mJ/cm<sup>2</sup> UVB, followed by treatment with the indicated of ginsenoside C-Mc (1, 10, 20, 30, 50, 100 and 200 µM). All data are shown as the mean ± SD of three independent experiments. \* indicate significant differences from the non-irradiated control and UVB-irradiated control groups. \* p < 0.05, \*\* p < 0.01 and \*\*\* p < 0.001 contrast with the UVB-irradiated control.

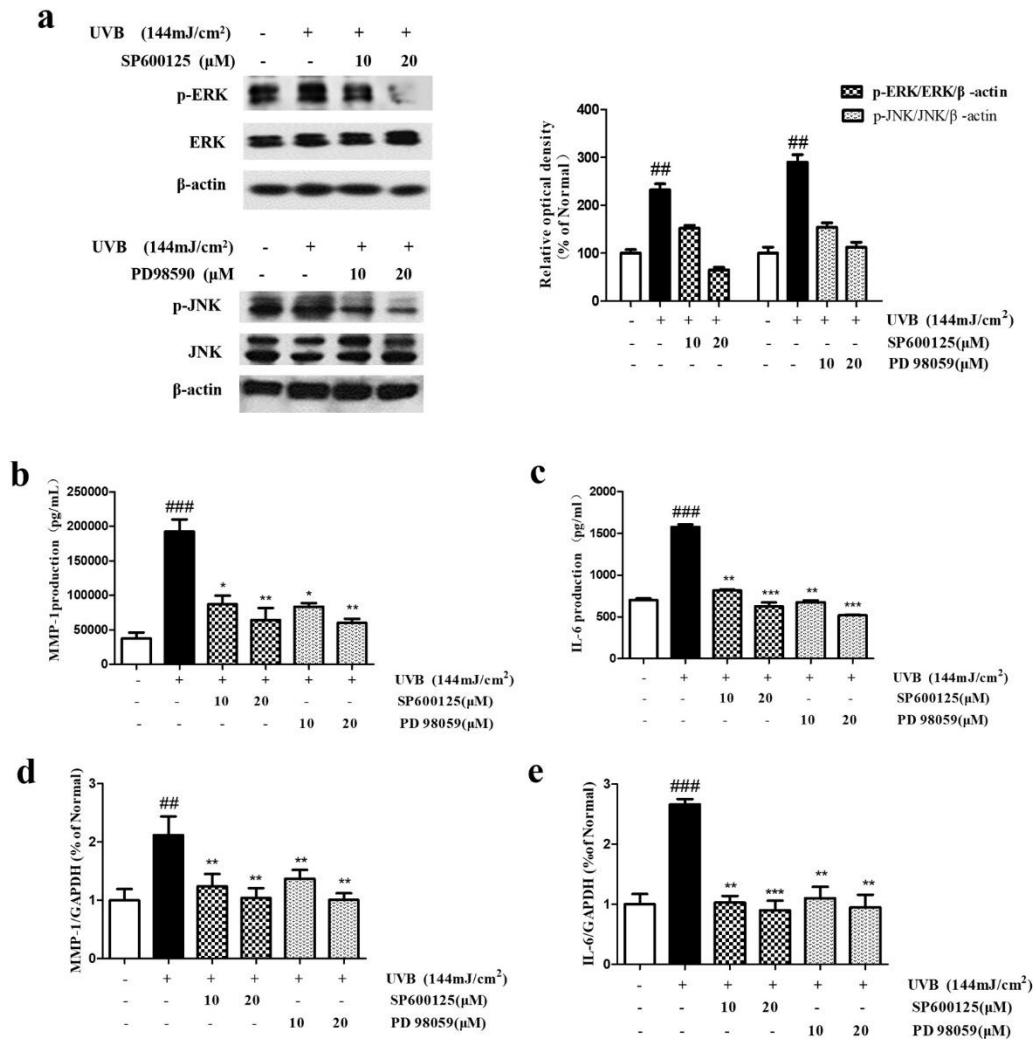

**Figure S5. Effects of MAPK inhibitors on UVB-exposed MAPK activation and MMP-1, IL-6 secretion in UVB-irradiated NHDFs.** NHDFs were pretreated with indicated concentrations of inhibitors (PD98590 and SP600125) for 2h, followed by UVB (144 mJ/cm<sup>2</sup>) irradiated, the cells were then incubated for 30min or 1h. **(a)** The protein levels of ERK and JNK in UVB-irradiated NHDFs were measured by Western blot analysis. The signal intensities for phosphorylation levels of ERK and JNK; Secreted **(b)** MMP-1, **(c)** IL-6 72h after irradiation were determined by ELISA kit. The mRNA expression of **(d)** MMP-1 and **(e)** IL-6 were measured by Real-Time PCR. The results are shown as the mean  $\pm$  SD of three independent experiments performed in triplicate. Number signs indicate a highly significant difference from the control cells. # $p < 0.05$ , ## $p < 0.01$ . Asterisks indicate a highly significant difference from the UVB-irradiated cells. \* $p < 0.05$ , \*\* $p < 0.01$ .

## Tables

**Table S1. Information, structures and anti-photoaging reference of ginsenosides collecting from literatures and PubChem database.**

| Pubchem CID | Class                        | Name                           | Inchikey                        | Source                                                                                  | PMID     |
|-------------|------------------------------|--------------------------------|---------------------------------|-----------------------------------------------------------------------------------------|----------|
| 12855889    | Known<br>photoaging<br>agent | anti-<br>Ginsenoside<br>Rc     | AGBCLJAHARWNL<br>A-DQUQINEDSA-N | American<br>ginseng;Panax<br>ginseng;Panax<br>notoginseng;Panacis<br>Quinquefolii Radix | 28713942 |
| 119307      | Known<br>photoaging<br>agent | anti-<br>Ginsenoside<br>Rh2    | CKUVNOCSBYHIS<br>-IRFFNABBSA-N  | American<br>ginseng;Panax<br>ginseng                                                    | 25116621 |
| 9918693     | Known<br>photoaging<br>agent | anti-<br>Ginsenoside<br>Rg3    | GZYPWOGIYAIIPV-<br>JBDTYSNRSA-N | American<br>ginseng;Panax<br>ginseng;Panax<br>japonicus var. major                      | 25056231 |
| 11815492    | Known<br>photoaging<br>agent | anti-<br>Ginsenoside<br>Ro     | JDCPEKQWFDWQLI<br>-LUQKBWBOSA-N | American<br>ginseng;Panax<br>ginseng C.A. Meyer                                         | 26214051 |
| 441921      | Known<br>photoaging<br>agent | anti-<br>Ginsenoside<br>Re     | NFZYDZXHKFHPGA<br>-QQHDHSITSA-M | American<br>ginseng;Panax<br>ginseng;Panacis<br>Quinquefolii Radix                      | 29755556 |
| 12901617    | Known<br>photoaging<br>agent | anti-<br>Ginsenoside<br>Rg3(S) | NODILNFGTFIURN-<br>GZPRDHCNSA-N | Panax ginseng;Panax<br>japonicus var. major                                             | 28793178 |
| 12912363    | Known<br>photoaging<br>agent | anti-<br>Ginsenoside<br>Rb3    | NODILNFGTFIURN-<br>USYOXQFSSA-N | Panax<br>notoginseng;Panacis<br>Quinquefolii Radix                                      | 26287932 |
| 122228242   | Known<br>photoaging<br>agent | anti-<br>Ginsenoside<br>R7     | NTYAVUNEPXGZQJ-<br>LUSMHSMSA-M  | Panax vietnamensis                                                                      | 31111375 |

|           |                              |       |                      |                                 |                                                                                                     |          |
|-----------|------------------------------|-------|----------------------|---------------------------------|-----------------------------------------------------------------------------------------------------|----------|
| N/A       | Known<br>photoaging<br>agent | anti- | Ginsenoside<br>C-Mx  | PWAOOJDMFUQOK<br>B-WCZZMFLVSA-N | Panax notoginseng                                                                                   | 29779217 |
| 441923    | Known<br>photoaging<br>agent | anti- | Ginsenoside<br>Rg1   | RWXIFXNRCLMQC<br>D-JBVRGBGGSA-N | American<br>ginseng;Panax<br>ginseng;Panax<br>japonicus var. major                                  | 26011399 |
| 6917976   | Known<br>photoaging<br>agent | anti- | Ginsenoside<br>Rb2   | RWXIFXNRCLMQC<br>D-UHFFFAOYSA-N | American<br>ginseng;Panax<br>ginseng;Panax<br>notoginseng;Panacis<br>Quinquefolii Radix             | 25774540 |
| 21599924  | Known<br>photoaging<br>agent | anti- | Ginsenoside<br>Rg2   | SHCBCKBYTHZQGZ<br>-DLHMIPLTSA-N | American<br>ginseng;Panax<br>ginseng;Panacis<br>Quinquefolii Radix                                  | 27816645 |
| 118987129 | Known<br>photoaging<br>agent | anti- | Ginsenoside<br>Rb(1) | VRWPEBVWQIPLB<br>M-AZIBQOHNSA-N | Panax<br>ginseng;American<br>ginseng                                                                | 19041641 |
| 9847853   | Known<br>photoaging<br>agent | anti- | Protopanaxatr<br>iol | YNBYFOIDLBTOM<br>W-JCZNUTPYSA-N | Panax ginseng                                                                                       | 33841016 |
| 9898279   | Known<br>photoaging<br>agent | anti- | Ginsenoside<br>Rb1   | YNBYFOIDLBTOM<br>W-QHNUHGIDSA-N | American<br>ginseng;Panax<br>ginseng;Panacis<br>Quinquefolii<br>Radix;Panax<br>japonicus var. major | 26189299 |
| 21672570  | Known<br>photoaging<br>agent | anti- | Ginsenoside<br>C-Y   | YURJSTAIMNSZAE-<br>HHNZYBFYSA-N | Ginsenoside C-Y                                                                                     | 31074886 |



|          |                                |       |                              |                                 |                                                                     |     |
|----------|--------------------------------|-------|------------------------------|---------------------------------|---------------------------------------------------------------------|-----|
| 75412551 | Unknown<br>photoaging<br>agent | anti- | 20R-<br>Ginsenoside<br>Rg2   | AGBCLJAHARWNL<br>A-UHFFFAOYSA-N | Panax ginseng Meyer                                                 | N/A |
| 85193319 | Unknown<br>photoaging<br>agent | anti- | Ginsenoside<br>Rh7           | ARPGURKWJGBPTN<br>-UHFFFAOYSA-N | Panax ginseng                                                       | N/A |
| 76602687 | Unknown<br>photoaging<br>agent | anti- | Ginsenoside<br>Ia            | AVTXSAWPGCSYFO<br>-UHFFFAOYSA-N | Panax ginseng                                                       | N/A |
| 75412555 | Unknown<br>photoaging<br>agent | anti- | Ginsenoside<br>Rk3           | AVXFIVJSCUOFNT-<br>UHFFFAOYSA-N | Ginseng;Panax<br>notoginseng                                        | N/A |
| 44584745 | Unknown<br>photoaging<br>agent | anti- | Ginsenoside<br>R10           | CFOKFXFKMQABR<br>M-UHFFFAOYSA-N | Panax quinquefolium<br>L                                            | N/A |
| 9896928  | Unknown<br>photoaging<br>agent | anti- | Ginsenoside<br>Mc            | CJFGBCWGOQRUR<br>Q-UHFFFAOYSA-N | Panax notoginseng                                                   | N/A |
| 14081290 | Unknown<br>photoaging<br>agent | anti- | (20R)-<br>Ginsenoside<br>Rh2 | CKUVNOCSBYHIS<br>-UHFFFAOYSA-N  | Panax ginseng;Panax<br>ginseng Meyer                                | N/A |
| 13386145 | Unknown<br>photoaging<br>agent | anti- | Chikusetsusa<br>ponin Ia     | DGSOBIYFLJXVQZ-<br>UHFFFAOYSA-N | Panax japonicus C.<br>A. Meyer                                      | N/A |
| 24721561 | Unknown<br>photoaging<br>agent | anti- | Ginsenoside-<br>Rd           | FBFMBWCLBGQEB<br>U-UHFFFAOYSA-N | American<br>ginseng;Panax<br>ginseng; Panax<br>japonicus var. major | N/A |
| 21599925 | Unknown<br>photoaging<br>agent | anti- | Notoginsenos<br>ide R2       | FNIRVWPHRMMRQI<br>-UHFFFAOYSA-N | Panax notoginseng                                                   | N/A |

|           |                                |       |                                                    |                                  |                                            |     |
|-----------|--------------------------------|-------|----------------------------------------------------|----------------------------------|--------------------------------------------|-----|
| 9852086   | Unknown<br>photoaging<br>agent | anti- | Ginsenosid<br>C-K                                  | FVIZARNDLVOMSU-<br>UHFFFAOYSA-N  | Panax ginseng                              | N/A |
| 14162969  | Unknown<br>photoaging<br>agent | anti- | Malonyl<br>ginsenoside<br>Rb2                      | FWCWPAUCBWOOG<br>G-UHFFFAOYSA-M  | Panax ginseng                              | N/A |
| 71587485  | Unknown<br>photoaging<br>agent | anti- | Gypenoside<br>III                                  | GZYPWOGIYAIIPV-<br>UHFFFAOYSA-N  | Panax ginseng;Panax<br>japonicus var.major | N/A |
| 85044013  | Unknown<br>photoaging<br>agent | anti- | Ginsenoside<br>Rs1                                 | HAJTYGKLQDXTPO<br>-UHFFFAOYSA-N  | Panax japonicus var.<br>major              | N/A |
| 46887678  | Unknown<br>photoaging<br>agent | anti- | Ginsenoside<br>F3                                  | HJRVLGWTJSLQIG-<br>UHFFFAOYSA-N  | Panax ginseng                              | N/A |
| 118753434 | Unknown<br>photoaging<br>agent | anti- | 20(S)-<br>Ginsenoside<br>RH2<br>metabolite<br>M3-6 | HOAFPPYAYXARJZ-<br>UHFFFAOYSA-N  | Panax ginseng                              | N/A |
| 122173224 | Unknown<br>photoaging<br>agent | anti- | (R)<br>Ginsenoside<br>Rh2                          | HPKGRCABTFZLLX-<br>UHFFFAOYSA-N  | Panax ginseng                              | N/A |
| 90478300  | Unknown<br>photoaging<br>agent | anti- | Ginsenoside-<br>M6A                                | IAEZLXLDZBZQPU-<br>UHFFFAOYSA-N  | Panax ginseng                              | N/A |
| 328775    | Unknown<br>photoaging<br>agent | anti- | Ginsenoside<br>A1                                  | JBGYS AVRIDZNKA-<br>UHFFFAOYSA-N | Panax quinquefolium<br>L.                  | N/A |
| 100018    | Unknown<br>photoaging<br>agent | anti- | Panaxoside<br>RC                                   | JDCPEKQWFDWQLI<br>-UHFFFAOYSA-N  | Panax ginseng                              | N/A |

|           |                                |       |                                                     |                                  |                                       |       |     |
|-----------|--------------------------------|-------|-----------------------------------------------------|----------------------------------|---------------------------------------|-------|-----|
| 131752646 | Unknown<br>photoaging<br>agent | anti- | Ginsenoside<br>Rh6                                  | JFTBERIHMIFXML-<br>UHFFFAOYSA-N  | Hydroponic<br>ginseng                 | Panax | N/A |
| 56949839  | Unknown<br>photoaging<br>agent | anti- | 12,6'-<br>Dioctanoyl<br>Ginsenoside<br>Rh2          | KCPBBZLPOURRDV<br>-UHFFFAOYSA-N  | Panax species                         |       | N/A |
| 118753436 | Unknown<br>photoaging<br>agent | anti- | 20(S)-<br>Ginsenoside<br>RH2<br>metabolite<br>M3-10 | KFHAXWKYIZJFQE-<br>UHFFFAOYSA-N  | Panax ginseng                         |       | N/A |
| 10629247  | Unknown<br>photoaging<br>agent | anti- | Vina-<br>ginsenoside<br>R25                         | KJZQRDAZSWKILI-<br>UHFFFAOYSA-N  | Panax vietnamensis                    |       | N/A |
| 131801343 | Unknown<br>photoaging<br>agent | anti- | Ginsenoside-<br>Rg6                                 | KSQILLJRLXANDD-<br>UHFFFAOYSA-N  | Steamed notoginseng                   |       | N/A |
| 100941542 | Unknown<br>photoaging<br>agent | anti- | Ginsenoside<br>Ra1                                  | KVMXBSSOCCPAOR<br>-UHFFFAOYSA-N  | Panax notoginseng                     |       | N/A |
| 124202620 | Unknown<br>photoaging<br>agent | anti- | Ginsenoside<br>Rk1,<br>analytical<br>standard       | KWDWB AISZWOAH<br>D-UHFFFAOYSA-N | Heat-processed<br>Panax ginseng Meyer |       | N/A |
| 46887590  | Unknown<br>photoaging<br>agent | anti- | Ginsenoside<br>F5                                   | KWRQPASKWCJCP-<br>UHFFFAOYSA-N   | Panax ginseng                         |       | N/A |
| 73981591  | Unknown<br>photoaging<br>agent | anti- | Ginsenoside<br>Ra0                                  | LDIAQNK CRRXZCD<br>-UHFFFAOYSA-N | Panacis Quinquefolii<br>Radix         |       | N/A |

|           |                                |       |                                |                                 |                                                                  |     |
|-----------|--------------------------------|-------|--------------------------------|---------------------------------|------------------------------------------------------------------|-----|
| 90658963  | Unknown<br>photoaging<br>agent | anti- | Netoginsenos<br>ide R1         | LLPWNQMSUYAGQI<br>-UHFFFAOYSA-N | Panax notoginseng                                                | N/A |
| 44592857  | Unknown<br>photoaging<br>agent | anti- | Vinaginsenos<br>ide R6         | MGROSLQKCJSBT-<br>UHFFFAOYSA-N  | Panax vietnamensis<br>HA et GRUSHV.                              | N/A |
| 90657714  | Unknown<br>photoaging<br>agent | anti- | Notoginsenos<br>ide Fe         | MYBAONSAUGZRA<br>X-UHFFFAOYSA-N | Panax notoginseng                                                | N/A |
| 92043620  | Unknown<br>photoaging<br>agent | anti- | Vinaginsenos<br>ide R3         | NJPDRQDELKMUTI-<br>UHFFFAOYSA-N | Panax quinquefolium<br>L.                                        | N/A |
| 11550001  | Unknown<br>photoaging<br>agent | anti- | Ginsenoside-<br>Rg5            | NJUXRKMKOFXMR<br>X-UHFFFAOYSA-N | Fine black ginseng                                               | N/A |
| 73598     | Unknown<br>photoaging<br>agent | anti- | Ginsenoside<br>C2              | NODILNFGTFIURN-<br>UHFFFAOYSA-N | Panax ginseng;Panax<br>notoginseng;Panacis<br>Quinquefolii Radix | N/A |
| 3086263   | Unknown<br>photoaging<br>agent | anti- | Malonyl-<br>ginsenoside<br>Rb1 | NTYAVUNEPXGZQJ-<br>UHFFFAOYSA-M | Panax japonicus var                                              | N/A |
| 102294900 | Unknown<br>photoaging<br>agent | anti- | Ginsenoside<br>Km              | NUJWGKNPSIVUOO<br>-UHFFFAOYSA-N | Panax ginseng                                                    | N/A |
| 3083376   | Unknown<br>photoaging<br>agent | anti- | Pseudo-<br>ginsenoside-<br>RI3 | ONZJEHSXUQSQCU-<br>UHFFFAOYSA-M | Panax pseudo-<br>ginseng                                         | N/A |
| 14162967  | Unknown<br>photoaging<br>agent | anti- | Malonyl<br>ginsenoside<br>Rd   | OSXWNRAKZUNVD<br>R-UHFFFAOYSA-M | Mountain cultivated<br>ginseng (MCG)                             | N/A |
| 21599928  | Unknown<br>photoaging<br>agent | anti- | Ginsenoside<br>Rh4             | OZTXYFOXQFKYRP<br>-UHFFFAOYSA-N | Panax notoginseng                                                | N/A |

|           |                                |       |                               |                                 |                                                 |     |
|-----------|--------------------------------|-------|-------------------------------|---------------------------------|-------------------------------------------------|-----|
| 20839223  | Unknown<br>photoaging<br>agent | anti- | Ginsenoside<br>Rh3            | PHLXREOMFNVWO<br>H-UHFFFAOYSA-N | Panax ginseng                                   | N/A |
| 21633074  | Unknown<br>photoaging<br>agent | anti- | Pseudo-<br>ginsenoside<br>RT  | PSOUXXNNRFNUAY<br>-UHFFFAOYSA-N | Panax vietnamensis                              | N/A |
| 58774156  | Unknown<br>photoaging<br>agent | anti- | Ginsenoside<br>B2             | PWAOOJDMFUQOK<br>B-UHFFFAOYSA-N | Panax<br>ginseng;Panacis<br>Quinquefolii Radix  | N/A |
| 11213350  | Unknown<br>photoaging<br>agent | anti- | (20S)-<br>Protopanaxad<br>iol | PYXFVCFISTUSOO-<br>UHFFFAOYSA-N | Panax ginseng                                   | N/A |
| 131751696 | Unknown<br>photoaging<br>agent | anti- | Ginsenoside I                 | QCCQLRNQOAMK<br>U-UHFFFAOYSA-N  | Korean ginseng<br>(Panax ginseng C.A.<br>Meyer) | N/A |
| 53447401  | Unknown<br>photoaging<br>agent | anti- | Ginsenoside-<br>F1            | QLPKLNOLHUEWSE<br>-UHFFFAOYSA-N | Panax ginseng                                   | N/A |
| 102004835 | Unknown<br>photoaging<br>agent | anti- | Ginsenoside<br>F4             | QOMBXPYXWGTFN<br>R-UHFFFAOYSA-N | Steamed notoginseng                             | N/A |
| 6441009   | Unknown<br>photoaging<br>agent | anti- | SCHEMBL1<br>5557558           | QOVKKEKBURQILF<br>-UHFFFAOYSA-N | Panax ginseng                                   | N/A |
| 73157064  | Unknown<br>photoaging<br>agent | anti- | Ginsenoside<br>Ra3            | QUNSGRLNZDSQJC-<br>UHFFFAOYSA-N | Panax notoginseng                               | N/A |
| 12855920  | Unknown<br>photoaging<br>agent | anti- | (20R)-<br>Ginsenoside<br>Rh1  | RAQNTCRNSXYLA<br>H-UHFFFAOYSA-N | Panax ginseng                                   | N/A |
| 432447    | Unknown<br>photoaging<br>agent | anti- | NSC308876                     | RLDVZILFNVRJTL-<br>UHFFFAOYSA-N | Panax ginseng                                   | N/A |

|           |                          |       |                                       |                              |                                               |     |
|-----------|--------------------------|-------|---------------------------------------|------------------------------|-----------------------------------------------|-----|
| 146160065 | Unknown photoaging agent | anti- | Ginsenoside Mb                        | RMHYFFDYVDOCSP-UHFFFAOYSA-N  | Panax notoginseng                             | N/A |
| 11468733  | Unknown photoaging agent | anti- | Protopanaxatriol                      | SHCBCKBYTHZQGZ-UHFFFAOYSA-N  | Ginseng;Notoginseng                           | N/A |
| 9918692   | Unknown photoaging agent | anti- | Ginsenoside F2                        | SWIROVJVGRGSPOUHFFFAOYSA-N   | Panax ginseng Meyer;Panax ginseng             | N/A |
| 100937823 | Unknown photoaging agent | anti- | Ginsenoside Rs3                       | TUMCLUKPDAYFA-UHFFFAOYSA-N   | Panax ginseng C.A. Meyer;Korean red ginseng   | N/A |
| 100941543 | Unknown photoaging agent | anti- | Ginsenoside Ra2                       | UEBIBJSWHIZNCA-UHFFFAOYSA-N  | Panax notoginseng                             | N/A |
| 101835368 | Unknown photoaging agent | anti- | Ginsenoside MRc                       | UOFHLCPCZXZURFL-UHFFFAOYSA-M | American ginseng;White-ginseng;sanchi-ginseng | N/A |
| 5176390   | Unknown photoaging agent | anti- | Vinaginsenoside R4                    | UOJAEODBOCLNBU-UHFFFAOYSA-N  | Panax ginseng                                 | N/A |
| 44593678  | Unknown photoaging agent | anti- | Vinaginsenoside R2                    | URPKGJNHPFKECW-UHFFFAOYSA-N  | Panax vietnamensis                            | N/A |
| 118753486 | Unknown photoaging agent | anti- | 20(S)-Ginsenoside RH2 metabolite M1-1 | UTTXMCFEQIEWFA-UHFFFAOYSA-N  | Panax ginseng                                 | N/A |
| 131751552 | Unknown photoaging agent | anti- | Ginsenoside III                       | UWGVFBVJCVDUPT-UHFFFAOYSA-N  | Panax ginseng;Panacis Quinquefolii            | N/A |

|           |                          |       |                       |                                  |                                         |     |
|-----------|--------------------------|-------|-----------------------|----------------------------------|-----------------------------------------|-----|
|           |                          |       |                       |                                  | Radix;Panax japonicus var. major        |     |
| 441922    | Unknown photoaging agent | anti- | Panaxoside RF         | UZIIOUZHBUYLDH<br>W-UHFFFAOYSA-N | Panax ginseng;Panax japonicus var.major | N/A |
| 101717751 | Unknown photoaging agent | anti- | Ginsenoside II        | VFRFTROKXBCTH<br>W-UHFFFAOYSA-N  | Panax ginseng                           | N/A |
| 85245726  | Unknown photoaging agent | anti- | Ginsenoside Rh8       | VGJOYFZLAIERID-<br>UHFFFAOYSA-N  | Panax ginseng                           | N/A |
| 146158775 | Unknown photoaging agent | anti- | Gypenoside IV         | VMFHKVMQSYOBA<br>V-UHFFFAOYSA-N  | Panax ginseng                           | N/A |
| 130009    | Unknown photoaging agent | anti- | Ginsenoside-La        | VOUCMBDNXOKLC<br>Q-UHFFFAOYSA-N  | Panax ginseng C. A. Meyer               | N/A |
| 181573    | Unknown photoaging agent | anti- | 20(R)-Ginsenoside Rg3 | VOWJAFYNABYJKY<br>-UHFFFAOYSA-N  | Red ginseng (Panax ginseng C.A Meyer)   | N/A |
| 44144330  | Unknown photoaging agent | anti- | Vinaginsenoside R1    | VTZDPCBUMTUOM<br>Y-UHFFFAOYSA-N  | American ginseng;Panax vietnamensis     | N/A |
| 90472238  | Unknown photoaging agent | anti- | Ginsenoside Rk2       | WMGBQZAELMGY<br>NO-UHFFFAOYSA-N  | Sun Ginseng                             | N/A |
| 85237385  | Unknown photoaging agent | anti- | Ginsenoside Rh5       | WTSNEXSNFSFTFK-<br>UHFFFAOYSA-N  | Panax ginseng                           | N/A |
| 9809542   | Unknown photoaging agent | anti- | Ginsenoside F1        | XNGXWSFSJIQMNC<br>-UHFFFAOYSA-N  | Korean Panax ginseng Meyer              | N/A |

|           |                                |       |                                                    |                                 |                                             |     |
|-----------|--------------------------------|-------|----------------------------------------------------|---------------------------------|---------------------------------------------|-----|
| 101887367 | Unknown<br>photoaging<br>agent | anti- | Pseudoginsen<br>oside Rh2                          | YCDZBVXSGVWFF<br>X-UHFFFAOYSA-N | Panax ginseng                               | N/A |
| 86289140  | Unknown<br>photoaging<br>agent | anti- | Gypenoside<br>LXXV                                 | YIYRCZFIJNGYOG-<br>UHFFFAOYSA-N | Panax ginseng                               | N/A |
| 73157065  | Unknown<br>photoaging<br>agent | anti- | Ginsenoside<br>Rs2                                 | YLMBQJRKOKVUCP<br>-UHFFFAOYSA-N | Panax japonicus var.<br>major               | N/A |
| 11331683  | Unknown<br>photoaging<br>agent | anti- | Ginsenoside<br>Mx                                  | YNBYFOIDLBTOM<br>W-UHFFFAOYSA-N | Panax ginseng                               | N/A |
| 432116    | Unknown<br>photoaging<br>agent | anti- | Ginsenoside<br>A2                                  | YURJSTAIMNSZAE-<br>UHFFFAOYSA-N | Panax ginseng;Panax<br>japonicus var. major | N/A |
| 131752701 | Unknown<br>photoaging<br>agent | anti- | Ginsenoside<br>M7cd                                | YWQANVSRCLRL<br>-UHFFFAOYSA-N   | Panax ginseng C.A.<br>Meyer                 | N/A |
| 100988292 | Unknown<br>photoaging<br>agent | anti- | 20(S)-<br>Ginsenoside<br>RH2<br>metabolite<br>M1-5 | ZIRHYQFOBJNNCZ-<br>UHFFFAOYSA-N | Panax ginseng                               | N/A |
| 44584555  | Unknown<br>photoaging<br>agent | anti- | Gynosaponin<br>S                                   | ZRBFCAALKKNCJG-<br>UHFFFAOYSA-N | Panax ginseng                               | N/A |
| 73758547  | Unknown<br>photoaging<br>agent | anti- | Notoginsenos<br>ide Fd                             | ZTQSADJAYQOCDD<br>-UHFFFAOYSA-N | Panax notoginseng                           | N/A |
| 91895489  | Unknown<br>photoaging<br>agent | anti- | Ginsenoside<br>Rg6                                 | ZVTVWDXRNMHGN<br>Y-UHFFFAOYSA-N | Steamed notoginseng                         | N/A |



|           |                                      |                    |                                 |               |     |
|-----------|--------------------------------------|--------------------|---------------------------------|---------------|-----|
| 102021585 | Unknown anti-<br>photoaging<br>agent | Ginsenoside<br>Rs5 | ZZTHVSDJFCDCGT-<br>UHFFFAOYSA-N | Panax ginseng | N/A |
|-----------|--------------------------------------|--------------------|---------------------------------|---------------|-----|

**Table S2. Binding energy and Hydrogen bonding interactions between atomic groups of receptor and ligand.**

| Protein | Drug                      | Docking Energy | Amino acid involved in interaction | H-bond distance (Å) | Hydrogen bonding interactions |         |
|---------|---------------------------|----------------|------------------------------------|---------------------|-------------------------------|---------|
|         |                           |                |                                    |                     | Ligand                        | Protein |
| MAPK    | Pyrazoloamine (Control)   | -5.78          | LYS165                             | 1.7                 | O---                          | HZ3     |
|         | Ginsenoside C-Mc          | -5.87          | HIS80                              | 1.5                 | CA---                         | HN      |
| NF-κB   | Andrographolide (Control) | -4.71          | GLN263                             | 1.2                 | H---                          | HE21    |
|         |                           |                | ARG297                             | 1.1                 | H---                          | HH21    |
|         | Ginsenoside C-Mc          | -6.18          | ASP293                             | 1.5                 | CA---                         | HN      |
| IL-6    |                           |                | LYS303                             | 1.6                 | CA---                         | HZ2     |
|         | Kirenol (Control)         | -4.07          | ARG30                              | 2.2                 | H---                          | O---    |
|         | Ginsenoside C-Mc          | -6.46          | ARG179                             | 1.5                 | O---                          | HH12    |
| TNF-α   |                           |                | LYS66                              | 1.5                 | O---                          | HZ1     |
|         | Sivelestat (Control)      | -2.97          | -                                  | -                   | -                             | -       |
|         | Ginsenoside C-Mc          | -4.53          | CYS96                              | 1.7                 | O---                          | HN      |

**Table S3. Drug-target network of ginsenoside C-Mc.**

| Gene Entrez ID | Targets (Coding gene official symbol) | Organism             | Source     |
|----------------|---------------------------------------|----------------------|------------|
| 3569           | IL-6                                  | Homo sapiens (Human) | Complex    |
| 4314           | MMP3                                  | Homo sapiens (Human) | Complex    |
| 4318           | MMP9                                  | Homo sapiens (Human) | Database   |
| 7421           | VDR                                   | Homo sapiens (Human) | bSDTNBI    |
| 6868           | TNF- α                                | Homo sapiens (Human) | Literature |
| 3091           | HIF1A                                 | Homo sapiens (Human) | Complex    |
| 4313           | MMP2                                  | Homo sapiens (Human) | Complex    |
| 3156           | HMGCR                                 | Homo sapiens (Human) | bSDTNBI    |
| 136            | ADORA2B                               | Homo sapiens (Human) | bSDTNBI    |
| 960            | CD44                                  | Homo sapiens (Human) | Database   |
| 1588           | CYP19A1                               | Homo sapiens (Human) | bSDTNBI    |
| 1956           | EGFR                                  | Homo sapiens (Human) | Complex    |

---

|           |                                   |                      |            |
|-----------|-----------------------------------|----------------------|------------|
| 4312      | MMP-1                             | Homo sapiens (Human) | Literature |
| 595       | cyclin D1                         | Homo sapiens (Human) | Literature |
| 162514    | TRPV3                             | Homo sapiens (Human) | bSDTNBI    |
| 2261      | ACh,acetylcholine                 | Homo sapiens (Human) | Literature |
| 7124      | TNF                               | Homo sapiens (Human) | Complex    |
| 4790      | NF-kB                             | Homo sapiens (Human) | Complex    |
| 4780      | Nrf2                              | Homo sapiens (Human) | Complex    |
| 5594      | MAPK1                             | Homo sapiens (Human) | Complex    |
| 23411     | SIRT1                             | Homo sapiens (Human) | Complex    |
| 3551      | IKBKB                             | Homo sapiens (Human) | Complex    |
| 207       | Akt1                              | Homo sapiens (Human) | Complex    |
| 3586      | IL10                              | Homo sapiens (Human) | Complex    |
| 4843      | NOS2                              | Homo sapiens (Human) | Complex    |
| 2526      | FUT4                              | Homo sapiens (Human) | Complex    |
| 3667      | IRS1                              | Homo sapiens (Human) | Complex    |
| 6523      | SGLT1                             | Homo sapiens (Human) | Complex    |
| 35671     | iNOS,induciblenitricoxidesynthase | Homo sapiens (Human) | Literature |
| 7040      | TGF- $\beta$                      | Homo sapiens (Human) | Literature |
| 100682424 | HO-1,hemeoxygenase-1              | Homo sapiens (Human) | Literature |
| 100329011 | VEGF                              | Homo sapiens (Human) | Literature |
| 12367     | caspase-3                         | Homo sapiens (Human) | Literature |
| 596       | bcl-2                             | Homo sapiens (Human) | Literature |
| 4087      | Smad2/3                           | Homo sapiens (Human) | Literature |
| 39728892  | PI3K                              | Homo sapiens (Human) | Literature |
| 5562      | AMPK                              | Homo sapiens (Human) | Literature |
| 100533320 | JNK                               | Homo sapiens (Human) | Literature |
| 18033     | NF- $\kappa$ B                    | Homo sapiens (Human) | Literature |
| 4513      | COX-2,cyclooxygenase-2            | Homo sapiens (Human) | Literature |
| 581       | bax                               | Homo sapiens (Human) | Literature |
| 1017      | CDK-2                             | Homo sapiens (Human) | Literature |
| 1019      | CDK-4                             | Homo sapiens (Human) | Literature |
| 3654      | IRAK-1                            | Homo sapiens (Human) | Literature |
| 1728      | NQO-1                             | Homo sapiens (Human) | Literature |
| 692466    | ERK                               | Homo sapiens (Human) | Literature |
| 778927    | p-38                              | Homo sapiens (Human) | Literature |
| 4286      | MITF                              | Homo sapiens (Human) | Literature |
| 4092      | Smad7                             | Homo sapiens (Human) | Literature |
| 683       | BST1                              | Homo sapiens (Human) | Database   |

---

---

|          |         |                      |            |
|----------|---------|----------------------|------------|
| 952      | CD38    | Homo sapiens (Human) | Database   |
| 4057     | LTF     | Homo sapiens (Human) | Database   |
| 4837     | NNMT    | Homo sapiens (Human) | Database   |
| 7018     | TF      | Homo sapiens (Human) | Database   |
| 10135    | NAMPT   | Homo sapiens (Human) | Database   |
| 22933    | SIRT2   | Homo sapiens (Human) | Database   |
| 23410    | SIRT3   | Homo sapiens (Human) | Database   |
| 80351    | TNKS2   | Homo sapiens (Human) | Database   |
| 128240   | APOA1BP | Homo sapiens (Human) | Database   |
| 145482   | PTGR2   | Homo sapiens (Human) | Database   |
| 1559     | CYP2C9  | Homo sapiens (Human) | Database   |
| 2353     | FOS     | Homo sapiens (Human) | Database   |
| 820      | CAMP    | Homo sapiens (Human) | Database   |
| 3162     | HMOX1   | Homo sapiens (Human) | Database   |
| 3553     | IL1B    | Homo sapiens (Human) | Database   |
| 5743     | PTGS2   | Homo sapiens (Human) | Database   |
| 6098     | ROS1    | Homo sapiens (Human) | Database   |
| 148327   | CREB3L4 | Homo sapiens (Human) | Database   |
| 1000     | CDH2    | Homo sapiens (Human) | Database   |
| 1051     | Cebpb   | Homo sapiens (Human) | Database   |
| 1432     | MAPK14  | Homo sapiens (Human) | Database   |
| 3576     | IL8     | Homo sapiens (Human) | Database   |
| 4629     | MYH11   | Homo sapiens (Human) | Database   |
| 5970     | RELA    | Homo sapiens (Human) | Database   |
| 6581     | SLC22A3 | Homo sapiens (Human) | Database   |
| 6615     | SNAI1   | Homo sapiens (Human) | Database   |
| 6657     | SOX2    | Homo sapiens (Human) | Database   |
| 6876     | TAGLN   | Homo sapiens (Human) | Database   |
| 7431     | VIM     | Homo sapiens (Human) | Database   |
| 79923    | NANOG   | Homo sapiens (Human) | Database   |
| 4846     | NOS3    | Homo sapiens (Human) | Database   |
| 5747     | PTK2    | Homo sapiens (Human) | Database   |
| 5829     | PXN     | Homo sapiens (Human) | Database   |
| 6714     | SRC     | Homo sapiens (Human) | Database   |
| 39868499 | GLP-1   | Homo sapiens (Human) | Literature |
| 2308     | FoxO1   | Homo sapiens (Human) | Literature |
| 12575    | MDA     | Homo sapiens (Human) | Literature |
| 6647     | SOD     | Homo sapiens (Human) | Literature |

---

|           |                                      |                      |            |
|-----------|--------------------------------------|----------------------|------------|
| 20850     | STAT5-PPAR                           | Homo sapiens (Human) | Literature |
| 875       | CBS,cystathionine- $\beta$ -synthase | Homo sapiens (Human) | Literature |
| 100194964 | CGL,cystathionine- $\gamma$ -lyase   | Homo sapiens (Human) | Literature |
| 1103      | ChAT,cholineacetyltransferase        | Homo sapiens (Human) | Literature |
| 13130     | DA,dopamine                          | Homo sapiens (Human) | Literature |
| 100033958 | eNOS,endothelialnitricoxidesynthase  | Homo sapiens (Human) | Literature |
| 2700445   | GLUT,glucosetransporter              | Homo sapiens (Human) | Literature |
| 100304604 | IFN,interferon                       | Homo sapiens (Human) | Literature |
| 16153     | IL,interleukin                       | Homo sapiens (Human) | Literature |
| 58022     | caspase-8                            | Homo sapiens (Human) | Literature |
| 12371     | caspase-9                            | Homo sapiens (Human) | Literature |
| 947215    | IAP                                  | Homo sapiens (Human) | Literature |
| 3355109   | PARP                                 | Homo sapiens (Human) | Literature |
| 6774      | STAT 3                               | Homo sapiens (Human) | Literature |
| 3099      | HK2                                  | Homo sapiens (Human) | Literature |
| 2768677   | p53                                  | Homo sapiens (Human) | Literature |
| 9997      | cytochrome c                         | Homo sapiens (Human) | Literature |
| 222236    | mitosis-related proteins             | Homo sapiens (Human) | Literature |
| 51339     | $\beta$ -catenin                     | Homo sapiens (Human) | Literature |
| 100641322 | Tcf                                  | Homo sapiens (Human) | Literature |
| 2068      | DNA-repair proteins                  | Homo sapiens (Human) | Literature |
| 1947      | Eph/ephrin                           | Homo spaiens (Human) | Literature |
| 142       | PARP-1                               | Homo sapiens (Human) | Literature |
| 5266      | PI3                                  | Homo sapiens (Human) | Literature |
| 51191     | cyclin E                             | Homo sapiens (Human) | Literature |
| 26413     | ERK                                  | Homo sapiens (Human) | Literature |
| 9606      | GCLC                                 | Homo sapiens (Human) | Literature |
| 2730      | GCLM                                 | Homo sapiens (Human) | Literature |
| 835008    | cp1                                  | Homo sapiens (Human) | Literature |
| 63976     | Prdm16                               | Homo sapiens (Human) | Literature |
| 10891     | Pgc1 $\alpha$                        | Homo sapiens (Human) | Literature |
| 1734      | Dio2                                 | Homo sapiens (Human) | Literature |
| 1149      | Cidea                                | Homo sapiens (Human) | Literature |
| 8309      | Acox2                                | Homo sapiens (Human) | Literature |
| 467       | Atf3                                 | Homo sapiens (Human) | Literature |
| 854403    | MCP-1                                | Homo sapiens (Human) | Literature |
| 104978912 | LDL                                  | Homo sapiens (Human) | Literature |

---

|           |                     |                      |            |
|-----------|---------------------|----------------------|------------|
| 47384     | SR-A                | Homo sapiens (Human) | Literature |
| 373523    | P16                 | Homo sapiens (Human) | Literature |
| 31381     | Rb                  | Homo sapiens (Human) | Literature |
| 34924     | CyclinE             | Homo sapiens (Human) | Literature |
| 7450832   | MAPK                | Homo sapiens (Human) | Literature |
| 51478     | PRAP                | Homo sapiens (Human) | Literature |
| 6524      | SLC5A2              | Homo sapiens (Human) | bSDTNBI    |
| 6462      | SHBG                | Homo sapiens (Human) | bSDTNBI    |
| 4598      | MVK                 | Homo sapiens (Human) | bSDTNBI    |
| 134       | ADORA1              | Homo sapiens (Human) | bSDTNBI    |
| 140       | ADORA3              | Homo sapiens (Human) | bSDTNBI    |
| 135       | ADORA2A             | Homo sapiens (Human) | bSDTNBI    |
| 151306    | GPBAR1              | Homo sapiens (Human) | bSDTNBI    |
| 9453      | GGPS1               | Homo sapiens (Human) | bSDTNBI    |
| 2908      | NR3C1               | Homo sapiens (Human) | bSDTNBI    |
| 9934      | P2RY14              | Homo sapiens (Human) | bSDTNBI    |
| 5770      | PTPN1               | Homo sapiens (Human) | bSDTNBI    |
| 6527      | SLC5A4              | Homo sapiens (Human) | bSDTNBI    |
| 3710      | ITPR3               | Homo sapiens (Human) | bSDTNBI    |
| 1880      | GPR183              | Homo sapiens (Human) | bSDTNBI    |
| 1269      | CNR2                | Homo sapiens (Human) | bSDTNBI    |
| 191       | AHCY                | Homo sapiens (Human) | bSDTNBI    |
| 55775     | TDP1                | Homo sapiens (Human) | bSDTNBI    |
| 4986      | OPRK1               | Homo sapiens (Human) | bSDTNBI    |
| 279       | AMY2A               | Homo sapiens (Human) | bSDTNBI    |
| 5031      | P2RY6               | Homo sapiens (Human) | bSDTNBI    |
| 5241      | PGR                 | Homo sapiens (Human) | bSDTNBI    |
| 866       | SERPINA6            | Homo sapiens (Human) | bSDTNBI    |
| 4985      | OPRD1               | Homo sapiens (Human) | bSDTNBI    |
| 2099      | ESR1                | Homo sapiens (Human) | bSDTNBI    |
| 4988      | OPRM1               | Homo sapiens (Human) | bSDTNBI    |
| 367       | AR                  | Homo sapiens (Human) | bSDTNBI    |
| 8972      | MGAM                | Homo sapiens (Human) | bSDTNBI    |
| 5029      | P2RY2               | Homo sapiens (Human) | bSDTNBI    |
| 276277278 | AMY1A; AMY1B; AMY1C | Homo sapiens (Human) | bSDTNBI    |
| 246       | ALOX15              | Homo sapiens (Human) | bSDTNBI    |
| 590       | BCHE                | Homo sapiens (Human) | bSDTNBI    |
| 1268      | CNR1                | Homo sapiens (Human) | bSDTNBI    |

---

---

|       |         |                      |         |
|-------|---------|----------------------|---------|
| 5030  | P2RY4   | Homo sapiens (Human) | bSDTNBI |
| 4306  | NR3C2   | Homo sapiens (Human) | bSDTNBI |
| 2847  | MCHR1   | Homo sapiens (Human) | bSDTNBI |
| 2222  | FDFT1   | Homo sapiens (Human) | bSDTNBI |
| 5034  | P4HB    | Homo sapiens (Human) | bSDTNBI |
| 6530  | SLC6A2  | Homo sapiens (Human) | bSDTNBI |
| 100   | ADA     | Homo sapiens (Human) | bSDTNBI |
| 5028  | P2RY1   | Homo sapiens (Human) | bSDTNBI |
| 132   | ADK     | Homo sapiens (Human) | bSDTNBI |
| 2100  | ESR2    | Homo sapiens (Human) | bSDTNBI |
| 239   | ALOX12  | Homo sapiens (Human) | bSDTNBI |
| 10599 | SLCO1B1 | Homo sapiens (Human) | bSDTNBI |
| 2224  | FDPS    | Homo sapiens (Human) | bSDTNBI |
| 2742  | GLRA2   | Homo sapiens (Human) | bSDTNBI |
| 23566 | LPAR3   | Homo sapiens (Human) | bSDTNBI |
| 10062 | NR1H3   | Homo sapiens (Human) | bSDTNBI |
| 6532  | SLC6A4  | Homo sapiens (Human) | bSDTNBI |
| 3632  | INPP5A  | Homo sapiens (Human) | bSDTNBI |
| 1585  | CYP11B2 | Homo sapiens (Human) | bSDTNBI |
| 29881 | NPC1L1  | Homo sapiens (Human) | bSDTNBI |
| 2539  | G6PD    | Homo sapiens (Human) | bSDTNBI |
| 4987  | OPRL1   | Homo sapiens (Human) | bSDTNBI |
| 5578  | PRKCA   | Homo sapiens (Human) | bSDTNBI |
| 1576  | CYP3A4  | Homo sapiens (Human) | bSDTNBI |
| 2741  | GLRA1   | Homo sapiens (Human) | bSDTNBI |
| 6097  | RORC    | Homo sapiens (Human) | bSDTNBI |
| 3417  | IDH1    | Homo sapiens (Human) | bSDTNBI |
| 3043  | HBB     | Homo sapiens (Human) | bSDTNBI |
| 5739  | PTGIR   | Homo sapiens (Human) | bSDTNBI |
| 5737  | PTGFR   | Homo sapiens (Human) | bSDTNBI |
| 3251  | HPRT1   | Homo sapiens (Human) | bSDTNBI |
| 79915 | ATAD5   | Homo sapiens (Human) | bSDTNBI |
| 7376  | NR1H2   | Homo sapiens (Human) | bSDTNBI |
| 5733  | PTGER3  | Homo sapiens (Human) | bSDTNBI |
| 3290  | HSD11B1 | Homo sapiens (Human) | bSDTNBI |
| 412   | STS     | Homo sapiens (Human) | bSDTNBI |
| 6531  | SLC6A3  | Homo sapiens (Human) | bSDTNBI |
| 240   | ALOX5   | Homo sapiens (Human) | bSDTNBI |

---

|        |         |                      |         |
|--------|---------|----------------------|---------|
| 3614   | IMPDH1  | Homo sapiens (Human) | bSDTNBI |
| 6713   | SQLE    | Homo sapiens (Human) | bSDTNBI |
| 1584   | CYP11B1 | Homo sapiens (Human) | bSDTNBI |
| 51053  | GMNN    | Homo sapiens (Human) | bSDTNBI |
| 57121  | LPAR5   | Homo sapiens (Human) | bSDTNBI |
| 43     | ACHE    | Homo sapiens (Human) | bSDTNBI |
| 2548   | GAA     | Homo sapiens (Human) | bSDTNBI |
| 7442   | TRPV1   | Homo sapiens (Human) | bSDTNBI |
| 1565   | CYP2D6  | Homo sapiens (Human) | bSDTNBI |
| 4842   | NOS1    | Homo sapiens (Human) | bSDTNBI |
| 6915   | TBXA2R  | Homo sapiens (Human) | bSDTNBI |
| 10724  | OGA     | Homo sapiens (Human) | bSDTNBI |
| 760    | CA2     | Homo sapiens (Human) | bSDTNBI |
| 5024   | P2RX3   | Homo sapiens (Human) | bSDTNBI |
| 5444   | PON1    | Homo sapiens (Human) | bSDTNBI |
| 8856   | NR1I2   | Homo sapiens (Human) | bSDTNBI |
| 115584 | SLC5A11 | Homo sapiens (Human) | bSDTNBI |
| 203068 | TUBB    | Homo sapiens (Human) | bSDTNBI |
| 5335   | PLCG1   | Homo sapiens (Human) | bSDTNBI |
| 11255  | HRH3    | Homo sapiens (Human) | bSDTNBI |
| 2840   | GPR17   | Homo sapiens (Human) | bSDTNBI |

**Table S4. List of the 124 skin photoaging-related genes (.xlsx).**

| Gene ID | Symbol    | Species      | David Gene Name                                              |
|---------|-----------|--------------|--------------------------------------------------------------|
| 8530    | CST7      | Homo sapiens | cystatin F(CST7)                                             |
| 728279  | KRTAP2-2  | Homo sapiens | keratin associated protein 2-2(KRTAP2-2)                     |
| 285313  | IGSF10    | Homo sapiens | immunoglobulin superfamily member 10(IGSF10)                 |
| 2551    | GABPA     | Homo sapiens | GA binding protein transcription factor alpha subunit(GABPA) |
| 83902   | KRTAP17-1 | Homo sapiens | keratin associated protein 17-1(KRTAP17-1)                   |
| 57864   | SLC46A2   | Homo sapiens | solute carrier family 46 member 2(SLC46A2)                   |
| 1459    | CSNK2A2   | Homo sapiens | casein kinase 2 alpha 2(CSNK2A2)                             |
| 402415  | XKRX      | Homo sapiens | XK related, X-linked(XKRX)                                   |
| 81850   | KRTAP1-3  | Homo sapiens | keratin associated protein 1-3(KRTAP1-3)                     |
| 81851   | KRTAP1-1  | Homo sapiens | keratin associated protein 1-1(KRTAP1-1)                     |
| 911     | CD1C      | Homo sapiens | CD1c molecule(CD1C)                                          |
| 152330  | CNTN4     | Homo sapiens | contactin 4(CNTN4)                                           |
| 9355    | LHX2      | Homo sapiens | LIM homeobox 2(LHX2)                                         |

|        |          |              |                                                                   |
|--------|----------|--------------|-------------------------------------------------------------------|
| 6001   | RGS10    | Homo sapiens | regulator of G-protein signaling 10(RGS10)                        |
| 3891   | KRT85    | Homo sapiens | keratin 85(KRT85)                                                 |
| 3892   | KRT86    | Homo sapiens | keratin 86(KRT86)                                                 |
| 1909   | EDNRA    | Homo sapiens | endothelin receptor type A(EDNRA)                                 |
| 1745   | DLX1     | Homo sapiens | distal-less homeobox 1(DLX1)                                      |
| 2159   | F10      | Homo sapiens | coagulation factor X(F10)                                         |
| 125    | ADH1B    | Homo sapiens | alcohol dehydrogenase 1B (class I), beta polypeptide(ADH1B)       |
| 254773 | LYG2     | Homo sapiens | lysozyme g2(LYG2)                                                 |
| 3883   | KRT33A   | Homo sapiens | keratin 33A(KRT33A)                                               |
| 3884   | KRT33B   | Homo sapiens | keratin 33B(KRT33B)                                               |
| 6358   | CCL14    | Homo sapiens | C-C motif chemokine ligand 14(CCL14)                              |
| 8935   | SKAP2    | Homo sapiens | src kinase associated phosphoprotein 2(SKAP2)                     |
| 3885   | KRT34    | Homo sapiens | keratin 34(KRT34)                                                 |
| 5947   | RBP1     | Homo sapiens | retinol binding protein 1(RBP1)                                   |
| 6252   | RTN1     | Homo sapiens | reticulon 1(RTN1)                                                 |
| 929    | CD14     | Homo sapiens | CD14 molecule(CD14)                                               |
| 9244   | CRLF1    | Homo sapiens | cytokine receptor like factor 1(CRLF1)                            |
| 6256   | RXRA     | Homo sapiens | retinoid X receptor alpha(RXRA)                                   |
| 7345   | UCHL1    | Homo sapiens | ubiquitin C-terminal hydrolase L1(UCHL1)                          |
| 5320   | PLA2G2A  | Homo sapiens | phospholipase A2 group IIA(PLA2G2A)                               |
| 5167   | ENPP1    | Homo sapiens | ectonucleotide pyrophosphatase/phosphodiesterase 1(ENPP1)         |
| 25960  | ADGRA2   | Homo sapiens | adhesion G protein-coupled receptor A2(ADGRA2)                    |
| 2207   | FCER1G   | Homo sapiens | Fc fragment of IgE receptor Ig(FCER1G)                            |
| 448834 | KPRP     | Homo sapiens | keratinocyte proline rich protein(KPRP)                           |
| 3937   | LCP2     | Homo sapiens | lymphocyte cytosolic protein 2(LCP2)                              |
| 81872  | Krtap2-1 | Homo sapiens | keratin associated protein 2-1(KRTAP2-1)                          |
| 83896  | KRTAP3-1 | Homo sapiens | keratin associated protein 3-1(KRTAP3-1)                          |
| 8549   | LGR5     | Homo sapiens | leucine rich repeat containing G protein-coupled receptor 5(LGR5) |
| 51702  | PADI3    | Homo sapiens | peptidyl arginine deiminase 3(PADI3)                              |
| 55507  | GPRC5D   | Homo sapiens | G protein-coupled receptor class C group 5 member D(GPRC5D)       |
| 57216  | VANGL2   | Homo sapiens | VANGL planar cell polarity protein 2                              |
| 6387   | CXCL12   | Homo sapiens | C-X-C motif chemokine ligand 12(CXCL12)                           |
| 6423   | SFRP2    | Homo sapiens | secreted frizzled related protein 2(SFRP2)                        |
| 10085  | EDIL3    | Homo sapiens | EGF like repeats and discoidin domains 3(EDIL3)                   |



---

|        |          |              |                                                  |
|--------|----------|--------------|--------------------------------------------------|
| 23276  | KLHL18   | Homo sapiens | kelch like family member 18(KLHL18)              |
| 7070   | THY1     | Homo sapiens | Thy-1 cell surface antigen(THY1)                 |
| 3394   | IRF8     | Homo sapiens | interferon regulatory factor 8(IRF8)             |
| 144110 | TMEM86A  | Homo sapiens | transmembrane protein 86A(TMEM86A)               |
| 2213   | Fcgr2b   | Homo sapiens | Fc fragment of IgG receptor IIb(FCGR2B)          |
| 50861  | STMN3    | Homo sapiens | stathmin 3(STMN3)                                |
| 945    | CD33     | Homo sapiens | CD33 molecule(CD33)                              |
| 283298 | olfml1   | Homo sapiens | olfactomedin like 1(OLFML1)                      |
| 6899   | TBX1     | Homo sapiens | T-box 1(TBX1)                                    |
| 9807   | IP6K1    | Homo sapiens | inositol hexakisphosphate kinase 1(IP6K1)        |
| 2736   | GLI2     | Homo sapiens | GLI family zinc finger 2(GLI2)                   |
| 64386  | MMP25    | Homo sapiens | MMP25 - matrix metalloproteinase 25              |
| 85293  | KRTAP3-3 | Homo sapiens | keratin associated protein 3-3(KRTAP3-3)         |
| 7122   | CLDN5    | Homo sapiens | claudin 5(CLDN5)                                 |
| 3684   | ITGAM    | Homo sapiens | integrin subunit alpha M(ITGAM)                  |
| 1381   | CRABP1   | Homo sapiens | cellular retinoic acid binding protein 1(CRABP1) |
| 112802 | KRT71    | Homo sapiens | keratin 71(KRT71)                                |
| 2624   | GATA2    | Homo sapiens | GATA binding protein 2(GATA2)                    |
| 54796  | BNC2     | Homo sapiens | basonuclin 2(BNC2)                               |
| 84645  | C22orf23 | Homo sapiens | chromosome 22 open reading frame 23(C22orf23)    |
| 84000  | TMPRSS13 | Homo sapiens | transmembrane protease, serine 13(TMPRSS13)      |
| 713    | C1QB     | Homo sapiens | complement C1q B chain(C1QB)                     |
| 3953   | LEPR     | Homo sapiens | leptin receptor(LEPR)                            |
| 8863   | PER3     | Homo sapiens | period circadian clock 3(PER3)                   |
| 3298   | HSF2     | Homo sapiens | heat shock transcription factor 2(HSF2)          |
| 7130   | TNFAIP6  | Homo sapiens | TNF alpha induced protein 6(TNFAIP6)             |
| 563    | AZGP1    | Homo sapiens | alpha-2-glycoprotein 1, zinc-binding(AZGP1)      |
| 3569   | IL6      | Homo sapiens | interleukin 6(IL6)                               |
| 1301   | COL11A1  | Homo sapiens | collagen type XI alpha 1 chain(COL11A1)          |
| 55655  | NLRP2    | Homo sapiens | NLR family pyrin domain containing 2(NLRP2)      |
| 3202   | HOXA5    | Homo sapiens | homeobox A5(HOXA5)                               |
| 3201   | HOXA4    | Homo sapiens | homeobox A4(HOXA4)                               |
| 84870  | rspo3    | Homo sapiens | R-spondin 3(RSPO3)                               |
| 4015   | LOX      | Homo sapiens | lysyl oxidase(LOX)                               |
| 10462  | CLEC10A  | Homo sapiens | C-type lectin domain family 10 member A(CLEC10A) |
| 6039   | RNASE6   | Homo sapiens | ribonuclease A family member k6(RNASE6)          |
| 4016   | LOXL1    | Homo sapiens | lysyl oxidase like 1(LOXL1)                      |
| 1949   | EFNB3    | Homo sapiens | ephrin B3(EFNB3)                                 |

---

|        |           |              |                                                                    |
|--------|-----------|--------------|--------------------------------------------------------------------|
| 969    | CD69      | Homo sapiens | CD69 molecule(CD69)                                                |
| 1306   | COL15A1   | Homo sapiens | collagen type XV alpha 1 chain(COL15A1)                            |
| 7021   | TFAP2B    | Homo sapiens | transcription factor AP-2 beta(TFAP2B)                             |
| 8111   | GPR68     | Homo sapiens | G protein-coupled receptor 68(GPR68)                               |
| 7025   | NR2F1     | Homo sapiens | nuclear receptor subfamily 2 group F member 1(NR2F1)               |
| 3340   | NDST1     | Homo sapiens | N-deacetylase and N-sulfotransferase 1(NDST1)                      |
| 80223  | RAB11FIP1 | Homo sapiens | RAB11 family interacting protein 1(RAB11FIP1)                      |
| 55662  | HIF1AN    | Homo sapiens | hypoxia inducible factor 1 alpha subunit inhibitor(HIF1AN)         |
| 1436   | CSF1R     | Homo sapiens | colony stimulating factor 1 receptor(CSF1R)                        |
| 2524   | FUT2      | Homo sapiens | fucosyltransferase 2(FUT2)                                         |
| 972    | CD74      | Homo sapiens | CD74 molecule(CD74)                                                |
| 10319  | LAMC3     | Homo sapiens | laminin subunit gamma 3(LAMC3)                                     |
| 1278   | COL1A2    | Homo sapiens | collagen type I alpha 2 chain(COL1A2)                              |
| 2123   | EVI2A     | Homo sapiens | ecotropic viral integration site 2A(EVI2A)                         |
| 1397   | CRIP2     | Homo sapiens | cysteine rich protein 2(CRIP2)                                     |
| 57720  | GPR107    | Homo sapiens | G protein-coupled receptor 107(GPR107)                             |
| 3212   | HOXB2     | Homo sapiens | homeobox B2(HOXB2)                                                 |
| 51621  | KLF13     | Homo sapiens | Kruppel like factor 13(KLF13)                                      |
| 10673  | TNFSF13B  | Homo sapiens | tumor necrosis factor superfamily member 13b(TNFSF13B)             |
| 978    | CDA       | Homo sapiens | cytidine deaminase(CDA)                                            |
| 5999   | RGS4      | Homo sapiens | regulator of G-protein signaling 4(RGS4)                           |
| 3976   | LIF       | Homo sapiens | leukemia inhibitory factor(LIF)                                    |
| 284110 | GSDMA     | Homo sapiens | gasdermin A(GSDMA)                                                 |
| 345275 | HSD17B13  | Homo sapiens | hydroxysteroid 17-beta dehydrogenase 13(HSD17B13)                  |
| 9332   | CD163     | Homo sapiens | CD163 molecule(CD163)                                              |
| 11095  | ADAMTS8   | Homo sapiens | ADAM metalloproteinase with thrombospondin type 1 motif 8(ADAMTS8) |
| 164656 | tmprss6   | Homo sapiens | transmembrane protease, serine 6(TMPRSS6)                          |
| 10163  | WASF2     | Homo sapiens | WAS protein family member 2(WASF2)                                 |
| 4321   | MMP12     | Homo sapiens | matrix metalloproteinase 12(MMP12)                                 |
| 3199   | HOXA2     | Homo sapiens | homeobox A2(HOXA2)                                                 |
| 57452  | GALNT16   | Homo sapiens | polypeptide N-acetylgalactosaminyltransferase 16(GALNT16)          |
| 1291   | COL6A1    | Homo sapiens | collagen type VI alpha 1 chain(COL6A1)                             |
| 57613  | FAM234B   | Homo sapiens | family with sequence similarity 234 member B(FAM234B)              |

|        |        |              |                                                          |
|--------|--------|--------------|----------------------------------------------------------|
| 80331  | DNAJC5 | Homo sapiens | DnaJ heat shock protein family (Hsp40) member C5(DNAJC5) |
| 151516 | ASPRV1 | Homo sapiens | aspartic peptidase, retroviral-like 1(ASPRV1)            |
| 1289   | COL5A1 | Homo sapiens | collagen type V alpha 1 chain(COL5A1)                    |
| 1047   | CLGN   | Homo sapiens | calmegin(CLGN)                                           |
| 4314   | MMP3   | Homo sapiens | matrix metalloproteinase 3(MMP3)                         |
| 4318   | MMP9   | Homo sapiens | matrix metalloproteinase 9(MMP9)                         |

**Table S5. The skin tissue-specific expression protein network containing 907 proteins (.xlsx).**

| Tissue              | NCBI-entrezID | Z-score  |
|---------------------|---------------|----------|
| Skin_specific_genes | 729240        | 5.385165 |
| Skin_specific_genes | 100129271     | 5.38516  |
| Skin_specific_genes | 353131        | 5.385154 |
| Skin_specific_genes | 3849          | 5.385153 |
| Skin_specific_genes | 26239         | 5.385152 |
| Skin_specific_genes | 448835        | 5.385149 |
| Skin_specific_genes | 353134        | 5.385147 |
| Skin_specific_genes | 353132        | 5.385144 |
| Skin_specific_genes | 353140        | 5.385121 |
| Skin_specific_genes | 353141        | 5.385118 |
| Skin_specific_genes | 353137        | 5.385115 |
| Skin_specific_genes | 353133        | 5.385102 |
| Skin_specific_genes | 353139        | 5.385025 |
| Skin_specific_genes | 388698        | 5.38496  |
| Skin_specific_genes | 145264        | 5.384702 |
| Skin_specific_genes | 374454        | 5.384543 |
| Skin_specific_genes | 386681        | 5.38442  |
| Skin_specific_genes | 386678        | 5.384072 |
| Skin_specific_genes | 653240        | 5.384068 |
| Skin_specific_genes | 386682        | 5.383965 |
| Skin_specific_genes | 254910        | 5.383926 |
| Skin_specific_genes | 353333        | 5.383835 |
| Skin_specific_genes | 386680        | 5.383796 |
| Skin_specific_genes | 386676        | 5.383767 |
| Skin_specific_genes | 4014          | 5.383523 |
| Skin_specific_genes | 1041          | 5.383509 |

---

|                     |           |          |
|---------------------|-----------|----------|
| Skin_specific_genes | 353323    | 5.383196 |
| Skin_specific_genes | 386679    | 5.383177 |
| Skin_specific_genes | 84639     | 5.382981 |
| Skin_specific_genes | 388555    | 5.382931 |
| Skin_specific_genes | 347516    | 5.382926 |
| Skin_specific_genes | 338322    | 5.382873 |
| Skin_specific_genes | 85289     | 5.382538 |
| Skin_specific_genes | 386683    | 5.382161 |
| Skin_specific_genes | 353332    | 5.382136 |
| Skin_specific_genes | 387836    | 5.381863 |
| Skin_specific_genes | 386685    | 5.380989 |
| Skin_specific_genes | 387266    | 5.380965 |
| Skin_specific_genes | 4759      | 5.380456 |
| Skin_specific_genes | 386677    | 5.380134 |
| Skin_specific_genes | 151516    | 5.380093 |
| Skin_specific_genes | 149708    | 5.379877 |
| Skin_specific_genes | 27178     | 5.379822 |
| Skin_specific_genes | 284486    | 5.379735 |
| Skin_specific_genes | 2312      | 5.379661 |
| Skin_specific_genes | 1823      | 5.379554 |
| Skin_specific_genes | 85290     | 5.379547 |
| Skin_specific_genes | 5673      | 5.379125 |
| Skin_specific_genes | 100505753 | 5.379109 |
| Skin_specific_genes | 386675    | 5.378776 |
| Skin_specific_genes | 284110    | 5.377694 |
| Skin_specific_genes | 100507608 | 5.377638 |
| Skin_specific_genes | 388818    | 5.377248 |
| Skin_specific_genes | 728255    | 5.376976 |
| Skin_specific_genes | 338785    | 5.376237 |
| Skin_specific_genes | 100505724 | 5.375779 |
| Skin_specific_genes | 85293     | 5.37575  |
| Skin_specific_genes | 8710      | 5.375601 |
| Skin_specific_genes | 344752    | 5.37509  |
| Skin_specific_genes | 83902     | 5.374875 |
| Skin_specific_genes | 199834    | 5.374111 |
| Skin_specific_genes | 7299      | 5.373936 |
| Skin_specific_genes | 100132386 | 5.372992 |
| Skin_specific_genes | 81870     | 5.372659 |

---

---

|                     |           |          |
|---------------------|-----------|----------|
| Skin_specific_genes | 59344     | 5.372524 |
| Skin_specific_genes | 83900     | 5.372504 |
| Skin_specific_genes | 81850     | 5.372501 |
| Skin_specific_genes | 85280     | 5.372415 |
| Skin_specific_genes | 22798     | 5.372357 |
| Skin_specific_genes | 728224    | 5.371882 |
| Skin_specific_genes | 387267    | 5.371185 |
| Skin_specific_genes | 643803    | 5.371043 |
| Skin_specific_genes | 83755     | 5.37038  |
| Skin_specific_genes | 448834    | 5.370328 |
| Skin_specific_genes | 85291     | 5.370004 |
| Skin_specific_genes | 83899     | 5.369228 |
| Skin_specific_genes | 6706      | 5.368986 |
| Skin_specific_genes | 2315      | 5.368978 |
| Skin_specific_genes | 84616     | 5.368595 |
| Skin_specific_genes | 83901     | 5.368015 |
| Skin_specific_genes | 100132476 | 5.366701 |
| Skin_specific_genes | 81871     | 5.366243 |
| Skin_specific_genes | 730755    | 5.365555 |
| Skin_specific_genes | 81851     | 5.364806 |
| Skin_specific_genes | 85285     | 5.363657 |
| Skin_specific_genes | 81872     | 5.361914 |
| Skin_specific_genes | 23581     | 5.361614 |
| Skin_specific_genes | 3888      | 5.361152 |
| Skin_specific_genes | 83895     | 5.359807 |
| Skin_specific_genes | 80740     | 5.359746 |
| Skin_specific_genes | 83896     | 5.359105 |
| Skin_specific_genes | 158833    | 5.358558 |
| Skin_specific_genes | 1474      | 5.35561  |
| Skin_specific_genes | 79097     | 5.354962 |
| Skin_specific_genes | 728279    | 5.352789 |
| Skin_specific_genes | 3858      | 5.352707 |
| Skin_specific_genes | 83897     | 5.352428 |
| Skin_specific_genes | 3884      | 5.352137 |
| Skin_specific_genes | 10850     | 5.352128 |
| Skin_specific_genes | 85294     | 5.351434 |
| Skin_specific_genes | 25833     | 5.35102  |
| Skin_specific_genes | 353135    | 5.35034  |

---

---

|                     |           |          |
|---------------------|-----------|----------|
| Skin_specific_genes | 125981    | 5.346889 |
| Skin_specific_genes | 58530     | 5.34655  |
| Skin_specific_genes | 127534    | 5.345593 |
| Skin_specific_genes | 147183    | 5.344447 |
| Skin_specific_genes | 3886      | 5.341442 |
| Skin_specific_genes | 8688      | 5.338102 |
| Skin_specific_genes | 439915    | 5.337282 |
| Skin_specific_genes | 1747      | 5.334777 |
| Skin_specific_genes | 254240    | 5.333741 |
| Skin_specific_genes | 9119      | 5.332399 |
| Skin_specific_genes | 59082     | 5.332211 |
| Skin_specific_genes | 319101    | 5.330017 |
| Skin_specific_genes | 93099     | 5.329006 |
| Skin_specific_genes | 123745    | 5.326474 |
| Skin_specific_genes | 765       | 5.325012 |
| Skin_specific_genes | 3229      | 5.324785 |
| Skin_specific_genes | 342574    | 5.323952 |
| Skin_specific_genes | 3891      | 5.323607 |
| Skin_specific_genes | 22943     | 5.319798 |
| Skin_specific_genes | 3887      | 5.313568 |
| Skin_specific_genes | 162605    | 5.308044 |
| Skin_specific_genes | 100431172 | 5.306086 |
| Skin_specific_genes | 3892      | 5.305789 |
| Skin_specific_genes | 51806     | 5.299313 |
| Skin_specific_genes | 3885      | 5.297719 |
| Skin_specific_genes | 112802    | 5.294732 |
| Skin_specific_genes | 337880    | 5.290362 |
| Skin_specific_genes | 10089     | 5.289211 |
| Skin_specific_genes | 3881      | 5.289194 |
| Skin_specific_genes | 163778    | 5.288473 |
| Skin_specific_genes | 2201      | 5.286916 |
| Skin_specific_genes | 5676      | 5.282876 |
| Skin_specific_genes | 1638      | 5.281496 |
| Skin_specific_genes | 646480    | 5.276618 |
| Skin_specific_genes | 1828      | 5.271966 |
| Skin_specific_genes | 50489     | 5.269941 |
| Skin_specific_genes | 126637    | 5.267608 |
| Skin_specific_genes | 390792    | 5.262973 |

---

---

|                     |           |          |
|---------------------|-----------|----------|
| Skin_specific_genes | 221301    | 5.261148 |
| Skin_specific_genes | 340654    | 5.260727 |
| Skin_specific_genes | 84560     | 5.259705 |
| Skin_specific_genes | 170680    | 5.257055 |
| Skin_specific_genes | 116093    | 5.254349 |
| Skin_specific_genes | 27177     | 5.254308 |
| Skin_specific_genes | 121391    | 5.252658 |
| Skin_specific_genes | 3848      | 5.252263 |
| Skin_specific_genes | 574414    | 5.249314 |
| Skin_specific_genes | 3889      | 5.236629 |
| Skin_specific_genes | 653499    | 5.232241 |
| Skin_specific_genes | 7062      | 5.225897 |
| Skin_specific_genes | 100533177 | 5.225703 |
| Skin_specific_genes | 158835    | 5.217831 |
| Skin_specific_genes | 768239    | 5.21537  |
| Skin_specific_genes | 29094     | 5.210402 |
| Skin_specific_genes | 10816     | 5.209325 |
| Skin_specific_genes | 643414    | 5.194081 |
| Skin_specific_genes | 242       | 5.192114 |
| Skin_specific_genes | 145447    | 5.192065 |
| Skin_specific_genes | 92211     | 5.189915 |
| Skin_specific_genes | 55076     | 5.188226 |
| Skin_specific_genes | 64711     | 5.184506 |
| Skin_specific_genes | 337879    | 5.178734 |
| Skin_specific_genes | 25818     | 5.171835 |
| Skin_specific_genes | 284353    | 5.171276 |
| Skin_specific_genes | 117159    | 5.169243 |
| Skin_specific_genes | 126767    | 5.168639 |
| Skin_specific_genes | 8687      | 5.164837 |
| Skin_specific_genes | 5069      | 5.159637 |
| Skin_specific_genes | 642       | 5.157198 |
| Skin_specific_genes | 3861      | 5.151901 |
| Skin_specific_genes | 3883      | 5.151593 |
| Skin_specific_genes | 8560      | 5.149308 |
| Skin_specific_genes | 26154     | 5.147219 |
| Skin_specific_genes | 3882      | 5.139939 |
| Skin_specific_genes | 337972    | 5.136695 |
| Skin_specific_genes | 285848    | 5.126277 |

---

---

|                     |        |          |
|---------------------|--------|----------|
| Skin_specific_genes | 83401  | 5.122788 |
| Skin_specific_genes | 5672   | 5.120834 |
| Skin_specific_genes | 909    | 5.11658  |
| Skin_specific_genes | 147920 | 5.106316 |
| Skin_specific_genes | 353288 | 5.091911 |
| Skin_specific_genes | 144501 | 5.089431 |
| Skin_specific_genes | 1046   | 5.085485 |
| Skin_specific_genes | 386674 | 5.085452 |
| Skin_specific_genes | 126917 | 5.083817 |
| Skin_specific_genes | 343641 | 5.082984 |
| Skin_specific_genes | 56998  | 5.082077 |
| Skin_specific_genes | 79983  | 5.08194  |
| Skin_specific_genes | 5669   | 5.081301 |
| Skin_specific_genes | 119548 | 5.078213 |
| Skin_specific_genes | 7045   | 5.045595 |
| Skin_specific_genes | 644054 | 5.045055 |
| Skin_specific_genes | 26525  | 5.032781 |
| Skin_specific_genes | 5806   | 5.023553 |
| Skin_specific_genes | 147700 | 5.018426 |
| Skin_specific_genes | 9333   | 5.015926 |
| Skin_specific_genes | 8139   | 5.012053 |
| Skin_specific_genes | 2250   | 5.010577 |
| Skin_specific_genes | 5650   | 5.004027 |
| Skin_specific_genes | 284348 | 4.992381 |
| Skin_specific_genes | 3963   | 4.991501 |
| Skin_specific_genes | 2707   | 4.986588 |
| Skin_specific_genes | 3120   | 4.975187 |
| Skin_specific_genes | 1308   | 4.957913 |
| Skin_specific_genes | 7306   | 4.955622 |
| Skin_specific_genes | 29113  | 4.950728 |
| Skin_specific_genes | 327657 | 4.942233 |
| Skin_specific_genes | 1775   | 4.939905 |
| Skin_specific_genes | 390093 | 4.934675 |
| Skin_specific_genes | 23086  | 4.925471 |
| Skin_specific_genes | 1749   | 4.905687 |
| Skin_specific_genes | 56300  | 4.898485 |
| Skin_specific_genes | 8091   | 4.890896 |
| Skin_specific_genes | 8456   | 4.87563  |

---



---

|                     |        |          |
|---------------------|--------|----------|
| Skin_specific_genes | 388533 | 4.836554 |
| Skin_specific_genes | 2335   | 4.824481 |
| Skin_specific_genes | 6274   | 4.798103 |
| Skin_specific_genes | 55507  | 4.793016 |
| Skin_specific_genes | 7286   | 4.790054 |
| Skin_specific_genes | 23087  | 4.772281 |
| Skin_specific_genes | 79850  | 4.766727 |
| Skin_specific_genes | 391123 | 4.76583  |
| Skin_specific_genes | 3857   | 4.74925  |
| Skin_specific_genes | 374897 | 4.748134 |
| Skin_specific_genes | 337882 | 4.740041 |
| Skin_specific_genes | 337959 | 4.738457 |
| Skin_specific_genes | 5670   | 4.733454 |
| Skin_specific_genes | 54346  | 4.730499 |
| Skin_specific_genes | 6785   | 4.71714  |
| Skin_specific_genes | 1944   | 4.716644 |
| Skin_specific_genes | 3228   | 4.705267 |
| Skin_specific_genes | 11247  | 4.702307 |
| Skin_specific_genes | 27006  | 4.692312 |
| Skin_specific_genes | 255189 | 4.686344 |
| Skin_specific_genes | 5317   | 4.677626 |
| Skin_specific_genes | 1825   | 4.669751 |
| Skin_specific_genes | 4311   | 4.645963 |
| Skin_specific_genes | 11219  | 4.643009 |
| Skin_specific_genes | 131578 | 4.626626 |
| Skin_specific_genes | 55806  | 4.623094 |
| Skin_specific_genes | 2019   | 4.610737 |
| Skin_specific_genes | 337971 | 4.606697 |
| Skin_specific_genes | 7499   | 4.603045 |
| Skin_specific_genes | 7473   | 4.588378 |
| Skin_specific_genes | 145226 | 4.573504 |
| Skin_specific_genes | 340745 | 4.566935 |
| Skin_specific_genes | 3227   | 4.525361 |
| Skin_specific_genes | 121214 | 4.516122 |
| Skin_specific_genes | 57864  | 4.501684 |
| Skin_specific_genes | 402415 | 4.481992 |
| Skin_specific_genes | 83481  | 4.478589 |
| Skin_specific_genes | 84525  | 4.47475  |

---

---

|                     |        |          |
|---------------------|--------|----------|
| Skin_specific_genes | 348938 | 4.465501 |
| Skin_specific_genes | 644815 | 4.463016 |
| Skin_specific_genes | 84000  | 4.445278 |
| Skin_specific_genes | 5268   | 4.44223  |
| Skin_specific_genes | 115908 | 4.420661 |
| Skin_specific_genes | 128876 | 4.416024 |
| Skin_specific_genes | 1832   | 4.414518 |
| Skin_specific_genes | 148741 | 4.412441 |
| Skin_specific_genes | 337974 | 4.411246 |
| Skin_specific_genes | 30814  | 4.399674 |
| Skin_specific_genes | 147409 | 4.380598 |
| Skin_specific_genes | 5542   | 4.374621 |
| Skin_specific_genes | 260434 | 4.372315 |
| Skin_specific_genes | 337966 | 4.352123 |
| Skin_specific_genes | 140258 | 4.336333 |
| Skin_specific_genes | 55584  | 4.324904 |
| Skin_specific_genes | 5271   | 4.323187 |
| Skin_specific_genes | 2117   | 4.307187 |
| Skin_specific_genes | 6095   | 4.293361 |
| Skin_specific_genes | 29986  | 4.283232 |
| Skin_specific_genes | 135228 | 4.282153 |
| Skin_specific_genes | 4015   | 4.281488 |
| Skin_specific_genes | 3416   | 4.271915 |
| Skin_specific_genes | 79412  | 4.267588 |
| Skin_specific_genes | 386684 | 4.253499 |
| Skin_specific_genes | 389336 | 4.250502 |
| Skin_specific_genes | 64065  | 4.240789 |
| Skin_specific_genes | 337973 | 4.240305 |
| Skin_specific_genes | 92196  | 4.220111 |
| Skin_specific_genes | 1301   | 4.216293 |
| Skin_specific_genes | 1748   | 4.216104 |
| Skin_specific_genes | 79755  | 4.210189 |
| Skin_specific_genes | 254773 | 4.208226 |
| Skin_specific_genes | 57152  | 4.205203 |
| Skin_specific_genes | 128488 | 4.202673 |
| Skin_specific_genes | 9076   | 4.192387 |
| Skin_specific_genes | 353144 | 4.190598 |
| Skin_specific_genes | 126410 | 4.180918 |

---

---

|                     |        |          |
|---------------------|--------|----------|
| Skin_specific_genes | 4861   | 4.173582 |
| Skin_specific_genes | 53833  | 4.163579 |
| Skin_specific_genes | 80834  | 4.156467 |
| Skin_specific_genes | 84951  | 4.123195 |
| Skin_specific_genes | 337963 | 4.118335 |
| Skin_specific_genes | 64919  | 4.11318  |
| Skin_specific_genes | 2261   | 4.10476  |
| Skin_specific_genes | 113146 | 4.098857 |
| Skin_specific_genes | 2709   | 4.097515 |
| Skin_specific_genes | 256227 | 4.093451 |
| Skin_specific_genes | 10793  | 4.088782 |
| Skin_specific_genes | 84290  | 4.083425 |
| Skin_specific_genes | 7020   | 4.07808  |
| Skin_specific_genes | 9314   | 4.074784 |
| Skin_specific_genes | 222584 | 4.067642 |
| Skin_specific_genes | 51200  | 4.066572 |
| Skin_specific_genes | 2625   | 4.063654 |
| Skin_specific_genes | 28976  | 4.059651 |
| Skin_specific_genes | 9572   | 4.036544 |
| Skin_specific_genes | 80352  | 4.031122 |
| Skin_specific_genes | 337970 | 4.026447 |
| Skin_specific_genes | 167127 | 4.01732  |
| Skin_specific_genes | 4038   | 4.017262 |
| Skin_specific_genes | 200424 | 3.988465 |
| Skin_specific_genes | 23299  | 3.981343 |
| Skin_specific_genes | 9610   | 3.978836 |
| Skin_specific_genes | 84975  | 3.978362 |
| Skin_specific_genes | 149428 | 3.977375 |
| Skin_specific_genes | 728318 | 3.968937 |
| Skin_specific_genes | 2617   | 3.967881 |
| Skin_specific_genes | 3037   | 3.962316 |
| Skin_specific_genes | 337976 | 3.961534 |
| Skin_specific_genes | 79852  | 3.960207 |
| Skin_specific_genes | 26585  | 3.959305 |
| Skin_specific_genes | 10848  | 3.940642 |
| Skin_specific_genes | 389119 | 3.92171  |
| Skin_specific_genes | 222    | 3.916294 |
| Skin_specific_genes | 4193   | 3.911828 |

---

---

|                     |           |          |
|---------------------|-----------|----------|
| Skin_specific_genes | 387273    | 3.901595 |
| Skin_specific_genes | 100131897 | 3.873379 |
| Skin_specific_genes | 3728      | 3.866397 |
| Skin_specific_genes | 150094    | 3.863293 |
| Skin_specific_genes | 80329     | 3.861859 |
| Skin_specific_genes | 479       | 3.861029 |
| Skin_specific_genes | 8808      | 3.855402 |
| Skin_specific_genes | 51499     | 3.84607  |
| Skin_specific_genes | 23650     | 3.841986 |
| Skin_specific_genes | 51195     | 3.839787 |
| Skin_specific_genes | 2051      | 3.828986 |
| Skin_specific_genes | 162514    | 3.824963 |
| Skin_specific_genes | 55294     | 3.817559 |
| Skin_specific_genes | 11072     | 3.816432 |
| Skin_specific_genes | 55504     | 3.793312 |
| Skin_specific_genes | 51554     | 3.782804 |
| Skin_specific_genes | 2825      | 3.782307 |
| Skin_specific_genes | 123099    | 3.781591 |
| Skin_specific_genes | 55304     | 3.769698 |
| Skin_specific_genes | 204219    | 3.759909 |
| Skin_specific_genes | 79669     | 3.736215 |
| Skin_specific_genes | 93517     | 3.735788 |
| Skin_specific_genes | 80320     | 3.731799 |
| Skin_specific_genes | 152519    | 3.729055 |
| Skin_specific_genes | 43847     | 3.728226 |
| Skin_specific_genes | 50487     | 3.725131 |
| Skin_specific_genes | 11202     | 3.724464 |
| Skin_specific_genes | 595       | 3.713799 |
| Skin_specific_genes | 728113    | 3.702976 |
| Skin_specific_genes | 26496     | 3.698236 |
| Skin_specific_genes | 83541     | 3.665753 |
| Skin_specific_genes | 2205      | 3.661351 |
| Skin_specific_genes | 25946     | 3.659724 |
| Skin_specific_genes | 50604     | 3.658007 |
| Skin_specific_genes | 4017      | 3.656186 |
| Skin_specific_genes | 26219     | 3.651288 |
| Skin_specific_genes | 57662     | 3.642559 |
| Skin_specific_genes | 54602     | 3.634982 |

---

---

|                     |           |          |
|---------------------|-----------|----------|
| Skin_specific_genes | 8626      | 3.632004 |
| Skin_specific_genes | 6374      | 3.630833 |
| Skin_specific_genes | 11187     | 3.620333 |
| Skin_specific_genes | 9547      | 3.620089 |
| Skin_specific_genes | 378884    | 3.594564 |
| Skin_specific_genes | 645402    | 3.59136  |
| Skin_specific_genes | 284207    | 3.585409 |
| Skin_specific_genes | 11166     | 3.58474  |
| Skin_specific_genes | 51384     | 3.57537  |
| Skin_specific_genes | 4312      | 3.562283 |
| Skin_specific_genes | 10248     | 3.560823 |
| Skin_specific_genes | 9697      | 3.556588 |
| Skin_specific_genes | 3664      | 3.547361 |
| Skin_specific_genes | 130576    | 3.539113 |
| Skin_specific_genes | 416       | 3.533999 |
| Skin_specific_genes | 441911    | 3.533079 |
| Skin_specific_genes | 57799     | 3.531809 |
| Skin_specific_genes | 3890      | 3.50869  |
| Skin_specific_genes | 53832     | 3.50616  |
| Skin_specific_genes | 158131    | 3.501386 |
| Skin_specific_genes | 245973    | 3.498806 |
| Skin_specific_genes | 8434      | 3.492212 |
| Skin_specific_genes | 84552     | 3.488419 |
| Skin_specific_genes | 8061      | 3.486814 |
| Skin_specific_genes | 64834     | 3.47832  |
| Skin_specific_genes | 92        | 3.471613 |
| Skin_specific_genes | 114771    | 3.456737 |
| Skin_specific_genes | 117194    | 3.455379 |
| Skin_specific_genes | 64768     | 3.446922 |
| Skin_specific_genes | 100191040 | 3.44592  |
| Skin_specific_genes | 11245     | 3.436059 |
| Skin_specific_genes | 23219     | 3.433839 |
| Skin_specific_genes | 2069      | 3.431436 |
| Skin_specific_genes | 345274    | 3.430948 |
| Skin_specific_genes | 11015     | 3.427129 |
| Skin_specific_genes | 150379    | 3.426462 |
| Skin_specific_genes | 10928     | 3.425295 |
| Skin_specific_genes | 6199      | 3.410545 |

---

---

|                     |           |          |
|---------------------|-----------|----------|
| Skin_specific_genes | 92126     | 3.410334 |
| Skin_specific_genes | 337975    | 3.40626  |
| Skin_specific_genes | 79690     | 3.402943 |
| Skin_specific_genes | 79092     | 3.402905 |
| Skin_specific_genes | 51228     | 3.396588 |
| Skin_specific_genes | 126433    | 3.394527 |
| Skin_specific_genes | 59345     | 3.386242 |
| Skin_specific_genes | 389541    | 3.362626 |
| Skin_specific_genes | 1984      | 3.356157 |
| Skin_specific_genes | 3872      | 3.353508 |
| Skin_specific_genes | 1956      | 3.332515 |
| Skin_specific_genes | 120066    | 3.325235 |
| Skin_specific_genes | 121457    | 3.324667 |
| Skin_specific_genes | 81706     | 3.318506 |
| Skin_specific_genes | 2829      | 3.303383 |
| Skin_specific_genes | 144110    | 3.298834 |
| Skin_specific_genes | 2200      | 3.297183 |
| Skin_specific_genes | 10644     | 3.295371 |
| Skin_specific_genes | 100133093 | 3.294968 |
| Skin_specific_genes | 1278      | 3.292581 |
| Skin_specific_genes | 84962     | 3.284782 |
| Skin_specific_genes | 643418    | 3.284709 |
| Skin_specific_genes | 133       | 3.282158 |
| Skin_specific_genes | 1960      | 3.280655 |
| Skin_specific_genes | 54733     | 3.277169 |
| Skin_specific_genes | 91694     | 3.276331 |
| Skin_specific_genes | 23596     | 3.268567 |
| Skin_specific_genes | 91        | 3.263569 |
| Skin_specific_genes | 1303      | 3.256857 |
| Skin_specific_genes | 2058      | 3.244193 |
| Skin_specific_genes | 580       | 3.241957 |
| Skin_specific_genes | 3159      | 3.237314 |
| Skin_specific_genes | 112724    | 3.232117 |
| Skin_specific_genes | 6059      | 3.230853 |
| Skin_specific_genes | 133060    | 3.227849 |
| Skin_specific_genes | 29904     | 3.220427 |
| Skin_specific_genes | 55038     | 3.216801 |
| Skin_specific_genes | 80157     | 3.208788 |

---

---

|                     |           |          |
|---------------------|-----------|----------|
| Skin_specific_genes | 3852      | 3.206552 |
| Skin_specific_genes | 54407     | 3.201824 |
| Skin_specific_genes | 4308      | 3.20055  |
| Skin_specific_genes | 7291      | 3.199163 |
| Skin_specific_genes | 148304    | 3.194234 |
| Skin_specific_genes | 118430    | 3.191833 |
| Skin_specific_genes | 84549     | 3.179723 |
| Skin_specific_genes | 132014    | 3.173541 |
| Skin_specific_genes | 51513     | 3.173357 |
| Skin_specific_genes | 84069     | 3.169442 |
| Skin_specific_genes | 23471     | 3.166655 |
| Skin_specific_genes | 2049      | 3.166637 |
| Skin_specific_genes | 9692      | 3.160848 |
| Skin_specific_genes | 8689      | 3.158895 |
| Skin_specific_genes | 3376      | 3.158855 |
| Skin_specific_genes | 122786    | 3.152035 |
| Skin_specific_genes | 84876     | 3.142693 |
| Skin_specific_genes | 4610      | 3.141377 |
| Skin_specific_genes | 23682     | 3.140065 |
| Skin_specific_genes | 160418    | 3.129357 |
| Skin_specific_genes | 7022      | 3.126915 |
| Skin_specific_genes | 1300      | 3.125648 |
| Skin_specific_genes | 644943    | 3.125288 |
| Skin_specific_genes | 338773    | 3.11317  |
| Skin_specific_genes | 79670     | 3.109135 |
| Skin_specific_genes | 8784      | 3.10348  |
| Skin_specific_genes | 10647     | 3.100428 |
| Skin_specific_genes | 6536      | 3.098657 |
| Skin_specific_genes | 402635    | 3.097217 |
| Skin_specific_genes | 1945      | 3.094581 |
| Skin_specific_genes | 728458    | 3.092356 |
| Skin_specific_genes | 100288323 | 3.085231 |
| Skin_specific_genes | 10643     | 3.082025 |
| Skin_specific_genes | 57115     | 3.073664 |
| Skin_specific_genes | 9949      | 3.059176 |
| Skin_specific_genes | 80765     | 3.055284 |
| Skin_specific_genes | 2191      | 3.04745  |
| Skin_specific_genes | 112399    | 3.047177 |

---

---

|                     |        |          |
|---------------------|--------|----------|
| Skin_specific_genes | 6591   | 3.047024 |
| Skin_specific_genes | 9651   | 3.04316  |
| Skin_specific_genes | 6704   | 3.023992 |
| Skin_specific_genes | 538    | 3.022752 |
| Skin_specific_genes | 5916   | 3.01886  |
| Skin_specific_genes | 6541   | 3.018027 |
| Skin_specific_genes | 8840   | 3.016836 |
| Skin_specific_genes | 2125   | 3.009433 |
| Skin_specific_genes | 344905 | 3.000027 |
| Skin_specific_genes | 80195  | 2.997373 |
| Skin_specific_genes | 1241   | 2.992061 |
| Skin_specific_genes | 1212   | 2.989373 |
| Skin_specific_genes | 57830  | 2.987971 |
| Skin_specific_genes | 11260  | 2.986775 |
| Skin_specific_genes | 80194  | 2.98277  |
| Skin_specific_genes | 342897 | 2.972949 |
| Skin_specific_genes | 195814 | 2.970847 |
| Skin_specific_genes | 5453   | 2.964694 |
| Skin_specific_genes | 89777  | 2.96384  |
| Skin_specific_genes | 10457  | 2.962667 |
| Skin_specific_genes | 27076  | 2.961311 |
| Skin_specific_genes | 5270   | 2.96048  |
| Skin_specific_genes | 401541 | 2.955209 |
| Skin_specific_genes | 391723 | 2.948838 |
| Skin_specific_genes | 11217  | 2.947318 |
| Skin_specific_genes | 1588   | 2.946516 |
| Skin_specific_genes | 302    | 2.943929 |
| Skin_specific_genes | 54897  | 2.94081  |
| Skin_specific_genes | 7477   | 2.930912 |
| Skin_specific_genes | 688    | 2.92803  |
| Skin_specific_genes | 160428 | 2.92614  |
| Skin_specific_genes | 2810   | 2.925137 |
| Skin_specific_genes | 55299  | 2.91844  |
| Skin_specific_genes | 201799 | 2.915055 |
| Skin_specific_genes | 10973  | 2.911317 |
| Skin_specific_genes | 5054   | 2.908639 |
| Skin_specific_genes | 117581 | 2.906857 |
| Skin_specific_genes | 339665 | 2.906226 |

---



---

|                     |        |          |
|---------------------|--------|----------|
| Skin_specific_genes | 56169  | 2.90455  |
| Skin_specific_genes | 389136 | 2.903589 |
| Skin_specific_genes | 6240   | 2.89703  |
| Skin_specific_genes | 7474   | 2.896018 |
| Skin_specific_genes | 5036   | 2.895851 |
| Skin_specific_genes | 84135  | 2.894759 |
| Skin_specific_genes | 171177 | 2.88969  |
| Skin_specific_genes | 3898   | 2.886643 |
| Skin_specific_genes | 960    | 2.88536  |
| Skin_specific_genes | 3224   | 2.880839 |
| Skin_specific_genes | 136    | 2.879174 |
| Skin_specific_genes | 92667  | 2.878977 |
| Skin_specific_genes | 8416   | 2.876766 |
| Skin_specific_genes | 54989  | 2.871284 |
| Skin_specific_genes | 25984  | 2.870165 |
| Skin_specific_genes | 341277 | 2.868262 |
| Skin_specific_genes | 196264 | 2.867128 |
| Skin_specific_genes | 7371   | 2.844173 |
| Skin_specific_genes | 913    | 2.838242 |
| Skin_specific_genes | 79191  | 2.830667 |
| Skin_specific_genes | 7057   | 2.830304 |
| Skin_specific_genes | 2247   | 2.822015 |
| Skin_specific_genes | 345651 | 2.816891 |
| Skin_specific_genes | 7980   | 2.813902 |
| Skin_specific_genes | 53836  | 2.807651 |
| Skin_specific_genes | 10226  | 2.804375 |
| Skin_specific_genes | 120065 | 2.799443 |
| Skin_specific_genes | 84262  | 2.794548 |
| Skin_specific_genes | 80346  | 2.789198 |
| Skin_specific_genes | 222894 | 2.788715 |
| Skin_specific_genes | 81555  | 2.78379  |
| Skin_specific_genes | 26472  | 2.78308  |
| Skin_specific_genes | 493869 | 2.782643 |
| Skin_specific_genes | 3265   | 2.780943 |
| Skin_specific_genes | 6820   | 2.779453 |
| Skin_specific_genes | 813    | 2.777412 |
| Skin_specific_genes | 381    | 2.774108 |
| Skin_specific_genes | 50805  | 2.772848 |

---

---

|                     |        |          |
|---------------------|--------|----------|
| Skin_specific_genes | 79993  | 2.768086 |
| Skin_specific_genes | 5352   | 2.768035 |
| Skin_specific_genes | 81565  | 2.760816 |
| Skin_specific_genes | 51388  | 2.758695 |
| Skin_specific_genes | 80262  | 2.755363 |
| Skin_specific_genes | 9420   | 2.753697 |
| Skin_specific_genes | 8796   | 2.752141 |
| Skin_specific_genes | 8793   | 2.750621 |
| Skin_specific_genes | 267020 | 2.750159 |
| Skin_specific_genes | 10451  | 2.750144 |
| Skin_specific_genes | 9721   | 2.749803 |
| Skin_specific_genes | 8038   | 2.746711 |
| Skin_specific_genes | 440050 | 2.742661 |
| Skin_specific_genes | 3156   | 2.741858 |
| Skin_specific_genes | 337977 | 2.738943 |
| Skin_specific_genes | 115572 | 2.738788 |
| Skin_specific_genes | 63970  | 2.730345 |
| Skin_specific_genes | 9554   | 2.730041 |
| Skin_specific_genes | 10970  | 2.727938 |
| Skin_specific_genes | 5163   | 2.727363 |
| Skin_specific_genes | 53335  | 2.726875 |
| Skin_specific_genes | 80045  | 2.725541 |
| Skin_specific_genes | 55223  | 2.722588 |
| Skin_specific_genes | 1293   | 2.717655 |
| Skin_specific_genes | 55561  | 2.712001 |
| Skin_specific_genes | 7984   | 2.710584 |
| Skin_specific_genes | 8581   | 2.707115 |
| Skin_specific_genes | 55752  | 2.706741 |
| Skin_specific_genes | 84283  | 2.702095 |
| Skin_specific_genes | 3606   | 2.698271 |
| Skin_specific_genes | 4004   | 2.688661 |
| Skin_specific_genes | 26225  | 2.687968 |
| Skin_specific_genes | 23160  | 2.676724 |
| Skin_specific_genes | 729830 | 2.672729 |
| Skin_specific_genes | 79190  | 2.671861 |
| Skin_specific_genes | 2773   | 2.670682 |
| Skin_specific_genes | 54361  | 2.670666 |
| Skin_specific_genes | 63933  | 2.663701 |

---

---

|                     |        |          |
|---------------------|--------|----------|
| Skin_specific_genes | 6050   | 2.659518 |
| Skin_specific_genes | 643853 | 2.65913  |
| Skin_specific_genes | 7465   | 2.658441 |
| Skin_specific_genes | 5917   | 2.656164 |
| Skin_specific_genes | 1277   | 2.649187 |
| Skin_specific_genes | 8614   | 2.648057 |
| Skin_specific_genes | 5118   | 2.646786 |
| Skin_specific_genes | 6731   | 2.644173 |
| Skin_specific_genes | 147372 | 2.636766 |
| Skin_specific_genes | 6176   | 2.626454 |
| Skin_specific_genes | 123169 | 2.621632 |
| Skin_specific_genes | 4285   | 2.621054 |
| Skin_specific_genes | 121665 | 2.62039  |
| Skin_specific_genes | 90956  | 2.607658 |
| Skin_specific_genes | 8411   | 2.606904 |
| Skin_specific_genes | 1678   | 2.60464  |
| Skin_specific_genes | 54510  | 2.603423 |
| Skin_specific_genes | 2967   | 2.601508 |
| Skin_specific_genes | 65985  | 2.600096 |
| Skin_specific_genes | 6382   | 2.596261 |
| Skin_specific_genes | 147495 | 2.595114 |
| Skin_specific_genes | 1290   | 2.594927 |
| Skin_specific_genes | 23276  | 2.593953 |
| Skin_specific_genes | 5279   | 2.592941 |
| Skin_specific_genes | 3692   | 2.592247 |
| Skin_specific_genes | 24145  | 2.591297 |
| Skin_specific_genes | 10009  | 2.590888 |
| Skin_specific_genes | 283489 | 2.584717 |
| Skin_specific_genes | 1294   | 2.584399 |
| Skin_specific_genes | 91298  | 2.576858 |
| Skin_specific_genes | 3068   | 2.574204 |
| Skin_specific_genes | 114990 | 2.571497 |
| Skin_specific_genes | 5887   | 2.567646 |
| Skin_specific_genes | 125988 | 2.566919 |
| Skin_specific_genes | 26135  | 2.565457 |
| Skin_specific_genes | 9358   | 2.561177 |
| Skin_specific_genes | 55181  | 2.55999  |
| Skin_specific_genes | 1849   | 2.55906  |

---

---

|                     |           |          |
|---------------------|-----------|----------|
| Skin_specific_genes | 151887    | 2.558681 |
| Skin_specific_genes | 390       | 2.558488 |
| Skin_specific_genes | 5017      | 2.556629 |
| Skin_specific_genes | 27042     | 2.553206 |
| Skin_specific_genes | 90060     | 2.551132 |
| Skin_specific_genes | 653145    | 2.551109 |
| Skin_specific_genes | 100137047 | 2.548886 |
| Skin_specific_genes | 6455      | 2.541814 |
| Skin_specific_genes | 283951    | 2.540376 |
| Skin_specific_genes | 29899     | 2.530895 |
| Skin_specific_genes | 79828     | 2.524912 |
| Skin_specific_genes | 10606     | 2.524577 |
| Skin_specific_genes | 59269     | 2.522206 |
| Skin_specific_genes | 6665      | 2.515686 |
| Skin_specific_genes | 115825    | 2.51347  |
| Skin_specific_genes | 85465     | 2.512573 |
| Skin_specific_genes | 5784      | 2.502747 |
| Skin_specific_genes | 1215      | 2.502283 |
| Skin_specific_genes | 57168     | 2.501688 |
| Skin_specific_genes | 10424     | 2.494734 |
| Skin_specific_genes | 4000      | 2.491615 |
| Skin_specific_genes | 339230    | 2.491458 |
| Skin_specific_genes | 653464    | 2.487506 |
| Skin_specific_genes | 57449     | 2.487346 |
| Skin_specific_genes | 10492     | 2.475514 |
| Skin_specific_genes | 9329      | 2.472956 |
| Skin_specific_genes | 54478     | 2.469823 |
| Skin_specific_genes | 400506    | 2.467996 |
| Skin_specific_genes | 64066     | 2.467082 |
| Skin_specific_genes | 1643      | 2.466698 |
| Skin_specific_genes | 158219    | 2.462612 |
| Skin_specific_genes | 11174     | 2.46086  |
| Skin_specific_genes | 11012     | 2.457726 |
| Skin_specific_genes | 128272    | 2.451857 |
| Skin_specific_genes | 163259    | 2.447438 |
| Skin_specific_genes | 51334     | 2.438834 |
| Skin_specific_genes | 4893      | 2.437407 |
| Skin_specific_genes | 3770      | 2.435718 |

---

---

|                     |        |          |
|---------------------|--------|----------|
| Skin_specific_genes | 54845  | 2.434446 |
| Skin_specific_genes | 647024 | 2.43299  |
| Skin_specific_genes | 6701   | 2.429455 |
| Skin_specific_genes | 430    | 2.426088 |
| Skin_specific_genes | 84659  | 2.423936 |
| Skin_specific_genes | 57216  | 2.412955 |
| Skin_specific_genes | 134957 | 2.410174 |
| Skin_specific_genes | 25921  | 2.4098   |
| Skin_specific_genes | 29968  | 2.408246 |
| Skin_specific_genes | 2589   | 2.395038 |
| Skin_specific_genes | 63943  | 2.392431 |
| Skin_specific_genes | 51154  | 2.392384 |
| Skin_specific_genes | 11221  | 2.389199 |
| Skin_specific_genes | 4313   | 2.387833 |
| Skin_specific_genes | 55207  | 2.387326 |
| Skin_specific_genes | 4853   | 2.385041 |
| Skin_specific_genes | 337867 | 2.378855 |
| Skin_specific_genes | 4609   | 2.377861 |
| Skin_specific_genes | 80131  | 2.37612  |
| Skin_specific_genes | 6222   | 2.375615 |
| Skin_specific_genes | 10758  | 2.370696 |
| Skin_specific_genes | 51441  | 2.367413 |
| Skin_specific_genes | 165679 | 2.36687  |
| Skin_specific_genes | 131566 | 2.363929 |
| Skin_specific_genes | 54555  | 2.36258  |
| Skin_specific_genes | 5591   | 2.35929  |
| Skin_specific_genes | 54433  | 2.358913 |
| Skin_specific_genes | 1175   | 2.357589 |
| Skin_specific_genes | 5395   | 2.357521 |
| Skin_specific_genes | 26872  | 2.356326 |
| Skin_specific_genes | 55659  | 2.354415 |
| Skin_specific_genes | 9841   | 2.354001 |
| Skin_specific_genes | 10265  | 2.353711 |
| Skin_specific_genes | 64864  | 2.351903 |
| Skin_specific_genes | 5469   | 2.348081 |
| Skin_specific_genes | 51493  | 2.34796  |
| Skin_specific_genes | 6715   | 2.34315  |
| Skin_specific_genes | 55198  | 2.341812 |

---

---

|                     |        |          |
|---------------------|--------|----------|
| Skin_specific_genes | 6897   | 2.337898 |
| Skin_specific_genes | 23016  | 2.337786 |
| Skin_specific_genes | 642475 | 2.333704 |
| Skin_specific_genes | 382    | 2.333082 |
| Skin_specific_genes | 200916 | 2.329612 |
| Skin_specific_genes | 55920  | 2.323922 |
| Skin_specific_genes | 57333  | 2.322783 |
| Skin_specific_genes | 51450  | 2.321797 |
| Skin_specific_genes | 10197  | 2.319564 |
| Skin_specific_genes | 27315  | 2.316785 |
| Skin_specific_genes | 23077  | 2.315621 |
| Skin_specific_genes | 9183   | 2.315123 |
| Skin_specific_genes | 64393  | 2.309728 |
| Skin_specific_genes | 731220 | 2.308439 |
| Skin_specific_genes | 83640  | 2.307877 |
| Skin_specific_genes | 1021   | 2.305567 |
| Skin_specific_genes | 23624  | 2.303736 |
| Skin_specific_genes | 23233  | 2.301757 |
| Skin_specific_genes | 51114  | 2.299356 |
| Skin_specific_genes | 647135 | 2.297513 |
| Skin_specific_genes | 6301   | 2.297372 |
| Skin_specific_genes | 51043  | 2.296425 |
| Skin_specific_genes | 9536   | 2.296025 |
| Skin_specific_genes | 4931   | 2.292726 |
| Skin_specific_genes | 90850  | 2.292144 |
| Skin_specific_genes | 23431  | 2.287526 |
| Skin_specific_genes | 64121  | 2.283943 |
| Skin_specific_genes | 5361   | 2.281782 |
| Skin_specific_genes | 24147  | 2.2812   |
| Skin_specific_genes | 6175   | 2.280361 |
| Skin_specific_genes | 286077 | 2.276832 |
| Skin_specific_genes | 440021 | 2.273518 |
| Skin_specific_genes | 2760   | 2.27331  |
| Skin_specific_genes | 8785   | 2.271551 |
| Skin_specific_genes | 353    | 2.269137 |
| Skin_specific_genes | 89958  | 2.267676 |
| Skin_specific_genes | 145748 | 2.267661 |
| Skin_specific_genes | 23002  | 2.265782 |

---

---

|                     |        |          |
|---------------------|--------|----------|
| Skin_specific_genes | 643904 | 2.261138 |
| Skin_specific_genes | 57146  | 2.260916 |
| Skin_specific_genes | 23065  | 2.26023  |
| Skin_specific_genes | 57111  | 2.256296 |
| Skin_specific_genes | 445328 | 2.254713 |
| Skin_specific_genes | 29841  | 2.25469  |
| Skin_specific_genes | 388567 | 2.252281 |
| Skin_specific_genes | 51534  | 2.249552 |
| Skin_specific_genes | 833    | 2.24898  |
| Skin_specific_genes | 8535   | 2.247766 |
| Skin_specific_genes | 8568   | 2.246721 |
| Skin_specific_genes | 8754   | 2.242019 |
| Skin_specific_genes | 8428   | 2.238696 |
| Skin_specific_genes | 51808  | 2.237332 |
| Skin_specific_genes | 54869  | 2.235807 |
| Skin_specific_genes | 5753   | 2.233851 |
| Skin_specific_genes | 2963   | 2.233591 |
| Skin_specific_genes | 55651  | 2.231766 |
| Skin_specific_genes | 51151  | 2.230397 |
| Skin_specific_genes | 343578 | 2.228585 |
| Skin_specific_genes | 908    | 2.228078 |
| Skin_specific_genes | 90019  | 2.226747 |
| Skin_specific_genes | 6223   | 2.226734 |
| Skin_specific_genes | 2150   | 2.226343 |
| Skin_specific_genes | 23205  | 2.224401 |
| Skin_specific_genes | 81786  | 2.220927 |
| Skin_specific_genes | 5478   | 2.218051 |
| Skin_specific_genes | 2178   | 2.217853 |
| Skin_specific_genes | 3939   | 2.216928 |
| Skin_specific_genes | 83743  | 2.213256 |
| Skin_specific_genes | 10458  | 2.212467 |
| Skin_specific_genes | 5130   | 2.207367 |
| Skin_specific_genes | 387521 | 2.20564  |
| Skin_specific_genes | 284098 | 2.204862 |
| Skin_specific_genes | 389558 | 2.203924 |
| Skin_specific_genes | 10631  | 2.201613 |
| Skin_specific_genes | 63928  | 2.199753 |
| Skin_specific_genes | 9509   | 2.199172 |

---

---

|                     |        |          |
|---------------------|--------|----------|
| Skin_specific_genes | 25832  | 2.19457  |
| Skin_specific_genes | 339175 | 2.194417 |
| Skin_specific_genes | 8894   | 2.192979 |
| Skin_specific_genes | 3918   | 2.191491 |
| Skin_specific_genes | 56603  | 2.18625  |
| Skin_specific_genes | 8323   | 2.183994 |
| Skin_specific_genes | 79797  | 2.183231 |
| Skin_specific_genes | 6712   | 2.180074 |
| Skin_specific_genes | 3226   | 2.1774   |
| Skin_specific_genes | 55536  | 2.177351 |
| Skin_specific_genes | 27113  | 2.176951 |
| Skin_specific_genes | 1946   | 2.176296 |
| Skin_specific_genes | 8602   | 2.175508 |
| Skin_specific_genes | 152002 | 2.174786 |
| Skin_specific_genes | 4323   | 2.174531 |
| Skin_specific_genes | 94137  | 2.174416 |
| Skin_specific_genes | 79939  | 2.17356  |
| Skin_specific_genes | 2107   | 2.169423 |
| Skin_specific_genes | 9188   | 2.169314 |
| Skin_specific_genes | 871    | 2.165975 |
| Skin_specific_genes | 55734  | 2.16401  |
| Skin_specific_genes | 6603   | 2.160819 |
| Skin_specific_genes | 55703  | 2.156295 |
| Skin_specific_genes | 11211  | 2.151677 |
| Skin_specific_genes | 26149  | 2.149044 |
| Skin_specific_genes | 10370  | 2.146222 |
| Skin_specific_genes | 204962 | 2.143686 |
| Skin_specific_genes | 1746   | 2.141702 |
| Skin_specific_genes | 5783   | 2.141438 |
| Skin_specific_genes | 124975 | 2.137918 |
| Skin_specific_genes | 29940  | 2.137799 |
| Skin_specific_genes | 54841  | 2.131462 |
| Skin_specific_genes | 653583 | 2.131193 |
| Skin_specific_genes | 60412  | 2.130656 |
| Skin_specific_genes | 9792   | 2.122001 |
| Skin_specific_genes | 84260  | 2.117746 |
| Skin_specific_genes | 3091   | 2.117413 |
| Skin_specific_genes | 57724  | 2.114893 |

---



---

|                     |        |          |
|---------------------|--------|----------|
| Skin_specific_genes | 23481  | 2.11405  |
| Skin_specific_genes | 5954   | 2.113061 |
| Skin_specific_genes | 57761  | 2.111755 |
| Skin_specific_genes | 57636  | 2.111615 |
| Skin_specific_genes | 4250   | 2.110278 |
| Skin_specific_genes | 79803  | 2.109908 |
| Skin_specific_genes | 285855 | 2.109892 |
| Skin_specific_genes | 154    | 2.10673  |
| Skin_specific_genes | 7508   | 2.105082 |
| Skin_specific_genes | 85450  | 2.103459 |
| Skin_specific_genes | 60370  | 2.103325 |
| Skin_specific_genes | 27     | 2.100597 |
| Skin_specific_genes | 11328  | 2.096976 |
| Skin_specific_genes | 125113 | 2.096639 |
| Skin_specific_genes | 22911  | 2.096383 |
| Skin_specific_genes | 9448   | 2.09552  |
| Skin_specific_genes | 5429   | 2.090374 |
| Skin_specific_genes | 9993   | 2.08478  |
| Skin_specific_genes | 6868   | 2.083404 |
| Skin_specific_genes | 84790  | 2.083202 |
| Skin_specific_genes | 81929  | 2.082973 |
| Skin_specific_genes | 1525   | 2.07773  |
| Skin_specific_genes | 26227  | 2.07736  |
| Skin_specific_genes | 6520   | 2.077273 |
| Skin_specific_genes | 57822  | 2.077003 |
| Skin_specific_genes | 51274  | 2.072012 |
| Skin_specific_genes | 1952   | 2.071509 |
| Skin_specific_genes | 705    | 2.069997 |
| Skin_specific_genes | 1026   | 2.065852 |
| Skin_specific_genes | 259266 | 2.06264  |
| Skin_specific_genes | 54918  | 2.061992 |
| Skin_specific_genes | 56915  | 2.061567 |
| Skin_specific_genes | 85456  | 2.06084  |
| Skin_specific_genes | 8661   | 2.058876 |
| Skin_specific_genes | 51491  | 2.057318 |
| Skin_specific_genes | 153572 | 2.056411 |
| Skin_specific_genes | 1174   | 2.05548  |
| Skin_specific_genes | 79071  | 2.055109 |

---

---

|                     |           |          |
|---------------------|-----------|----------|
| Skin_specific_genes | 55798     | 2.053829 |
| Skin_specific_genes | 55356     | 2.051661 |
| Skin_specific_genes | 653247    | 2.05032  |
| Skin_specific_genes | 55247     | 2.048351 |
| Skin_specific_genes | 6624      | 2.046434 |
| Skin_specific_genes | 92421     | 2.045471 |
| Skin_specific_genes | 144108    | 2.044057 |
| Skin_specific_genes | 1736      | 2.043109 |
| Skin_specific_genes | 23172     | 2.043043 |
| Skin_specific_genes | 64866     | 2.04284  |
| Skin_specific_genes | 79183     | 2.04231  |
| Skin_specific_genes | 57609     | 2.041751 |
| Skin_specific_genes | 342909    | 2.040314 |
| Skin_specific_genes | 140459    | 2.03971  |
| Skin_specific_genes | 114882    | 2.037266 |
| Skin_specific_genes | 65062     | 2.036426 |
| Skin_specific_genes | 4691      | 2.034748 |
| Skin_specific_genes | 100462983 | 2.034619 |
| Skin_specific_genes | 6736      | 2.034198 |
| Skin_specific_genes | 161424    | 2.033239 |
| Skin_specific_genes | 6385      | 2.032092 |
| Skin_specific_genes | 23243     | 2.031894 |
| Skin_specific_genes | 1513      | 2.031533 |
| Skin_specific_genes | 8751      | 2.030347 |
| Skin_specific_genes | 7335      | 2.029583 |
| Skin_specific_genes | 55771     | 2.029521 |
| Skin_specific_genes | 54933     | 2.0285   |
| Skin_specific_genes | 10940     | 2.02837  |
| Skin_specific_genes | 55083     | 2.028306 |
| Skin_specific_genes | 121642    | 2.027807 |
| Skin_specific_genes | 8879      | 2.026567 |
| Skin_specific_genes | 3916      | 2.022534 |
| Skin_specific_genes | 143244    | 2.02045  |
| Skin_specific_genes | 23268     | 2.019696 |
| Skin_specific_genes | 64746     | 2.019148 |
| Skin_specific_genes | 2697      | 2.015398 |
| Skin_specific_genes | 90678     | 2.014328 |
| Skin_specific_genes | 54626     | 2.013348 |

---

|                     |           |          |
|---------------------|-----------|----------|
| Skin_specific_genes | 100134934 | 2.012861 |
| Skin_specific_genes | 84879     | 2.012222 |
| Skin_specific_genes | 10017     | 2.005455 |
| Skin_specific_genes | 7421      | 2.004886 |
| Skin_specific_genes | 54994     | 2.002747 |
| Skin_specific_genes | 6502      | 2.001644 |
| Skin_specific_genes | 2055      | 2.000219 |

**Table S6. Real-time PCR Primers.**

| Gene               | Primer sequence-forward | Primer sequence-reverse |
|--------------------|-------------------------|-------------------------|
| GAPDH              | CCAAGGAGTAAGACCCCTGG    | AGGGGAGATTCAGTGTGGTG    |
| MMP-1              | TGGGAGGCAAGTTGAAAAGC    | CATCTGGGCTGCTTCATCAC    |
| MMP-3              | CCTGCTTTGTCC TTTGATGC   | TGAGTCAATCCCTGGAAAGTC   |
| Procollagen type I | CTCGAGGTGGACACCCT       | CAGCTGGATGGCCACATCGG    |
| iNOS               | ACCCAAGGTCTACGTTCAAG    | CGCACATCTCCGCAAATGTA    |
| TNF- $\alpha$      | AGGGGA AATGAGAGACGCAA   | TTCCCATCTCTTGCCACAT     |
| IL-6               | CTCCTTCTCCACAAGCGCC     | GCCGAAGAGCCCTCAGGC      |

**Table S7. The 22 ginsenosides with significant shortest distance ( $D_{min}<0.2$ ) to the set of known anti-photoaging ginsenosides.**

| Pubchem CID | Name                  | Smiles                                                                                                                               | Shortest distance |
|-------------|-----------------------|--------------------------------------------------------------------------------------------------------------------------------------|-------------------|
| 181573      | 20(R)-Ginsenoside Rg3 | <chem>O1C(CO)C(O)C(O)C(OC2OC(CO)C(O)C(O)C2O)C1OC1CCC2(C(CCC3C2CC(O)C2(C)C3(CCC2C(O)(CCC=C(C)C)C)C)C1(C)C)C</chem>                    | 0.002370871       |
| 432447      | NSC308876             | <chem>O1C(CO)C(O)C(O)C(OC2OC(CO)C(O)C(O)C2O)C1OC1CCC2(C(CCC3(C2CC(O)C2C3(CCC2C(OC2OC(CO)C(O)C(O)C2O)(CCC=C(C)C)C)C)C)C1(C)C)C</chem> | 0.010510023       |
| 44584555    | Gynosaponin S         | <chem>O1C(CO)C(O)C(O)C(O)C1OC1CCC2(C(CCC3(C2CC(O)C2C3(CCC2C(OC2OC(COC3OC(CO)C(O)C(O)C3O)C(O)C(O)C2O)(CCC=C(C)C)C)C)C)C1(C)C)C</chem> | 0.015294697       |

|           |                       |                                                                                                                                            |             |
|-----------|-----------------------|--------------------------------------------------------------------------------------------------------------------------------------------|-------------|
| 86289140  | Gypenoside LXXV       | <chem>O1C(COC2OC(CO)C(O)C(O)C2O)C(O)C(O)C(O)C1OC(CCC=C(C)C)(C)C1C2C(CC1)(C)C1(C(CC2O)C2(C(CC1)C(C)(C)C(O)CC2)C)C</chem>                    | 0.0178612   |
| 9918692   | Ginsenoside F2        | <chem>O1C(CO)C(O)C(O)C(O)C1OC1CCC2(C(CCC3(C2CC(O)C2C3(CCC2C(OC2OC(CO)C(O)C(O)C2O)(CCC=C(C)C)C)C)C)C1(C)C</chem>                            | 0.02634638  |
| 20839223  | Ginsenoside Rh3       | <chem>O1C(CO)C(O)C(O)C(O)C1OC1CCC2(C(CCC3(C2CC(O)C2C3(CCC2C(=CCC=C(C)C)C)C)C)C)C1(C)C)C</chem>                                             | 0.038878612 |
| 90472238  | Ginsenoside Rk2       | <chem>O1C(CO)C(O)C(O)C(O)C1OC1CCC2(C(CCC3(C2CC(O)C2C3(CCC2C(CCC=C(C)C)=C)C)C)C)C1(C)C)C</chem>                                             | 0.054841947 |
| 101887367 | Pseudoginsenoside Rh2 | <chem>O1C(CO)C(O)C(O)C(O)C1OC1CCC2(C(CCC3(C2CC(O)C2C3(CCC2C(=CCCC(O)(C)C)C)C)C)C)C1(C)C)C</chem>                                           | 0.070376992 |
| 146160065 | Ginsenoside Mb        | <chem>O1C(CO)C(O)C(O)C(O)C1OC1CCC2(C(CCC3(C2CC(O)C2C3(CCC2C(CCC=C(C)C)COC2OC(COC3OC(CO)C(O)C3O)C(O)C(O)C2O)C)C)C)C1(C)C)C</chem>           | 0.098505876 |
| 131751696 | Ginsenoside I         | <chem>O1C(CO)C(O)C(O)C(OC2OC(CO)C(O)C(O)C2O)C1OC1CCC2(C(CCC3(C2CC(O)C2C3(CCC2C(OC2OC(CO)C(O)C(O)C2O)(CCC(OO)C(C)=C)C)C)C)C)C1(C)C)C</chem> | 0.101592358 |
| 122173224 | (R) Ginsenoside Rh2   | <chem>O1C(CO)C(O)C(O)C(O)C1OC1CCC2(C(CCC3C2C(C(O)C2C(CCC23C)(C(O)(CCC=C(C)C)C)C)C)C)C1(C)C)C</chem>                                        | 0.115939704 |
| 14081290  | (20R)-Ginsenoside Rh2 | <chem>O1C(CO)C(O)C(O)C(O)C1OC1CCC2(C(CCC3(C2CC(O)C2C3(CCC2C(O)(CCC=C(C)C)C)C)C)C)C1(C)C)C</chem>                                           | 0.130329937 |
| 91895489  | Ginsenoside Rg6       | <chem>O1C(CO)C(O)C(O)C(OC2OC(C)C(O)C(O)C2O)C1OC1C2C(C)(C)C(O)CCC2(C2CC(O)C3C(CCC3C(CCC=C(C)C)=C)(C)C2(C1)C)C</chem>                        | 0.150443362 |
| 11331683  | Ginsenoside Mx        | <chem>O1C(COC2OCC(O)C(O)C2O)C(O)C(O)C(O)C1OC(CCC=C(C)C)(C)C1C2C(CC1)(C)C1(C(CC2O)C2(C(CC1)C(C)(C)C(O)CC2)C)C</chem>                        | 0.158719637 |
| 73758547  | Notoginsenoside Fd    | <chem>O1C(CO)C(O)C(O)C(O)C1OC1CCC2(C(CCC3(C2CC(O)C2C3(CCC2C(OC2OC(COC3OCC(O)C(O)C3O)C(O)C(O)C2O)(CCC=C(C)C)C)C)C)C)C1(C)C)C</chem>         | 0.166430172 |

|           |                      |                                                                                                                                                          |             |
|-----------|----------------------|----------------------------------------------------------------------------------------------------------------------------------------------------------|-------------|
| 9896928   | Ginsenoside Mc       | 01C(COC2OC(CO)C(O)C2O)C(O)C(O)C(O)C1OC<br>(CCC=C(C)C)(C)C1C2C(CC1)(C)C1(C(CC2O)C2(<br>C(CC1)C(C)(C)C(O)CC2)C)C                                           | 0.167077587 |
| 131751552 | Ginsenoside III      | 01C(CO)C(O)C(O)C(OC2OC(CO)C(O)C(O)C2O)C<br>1OC1CCC2(C(CCC3(C2CC(O)C2C3(CCC2C(OC2<br>OC(CO)C(O)C(O)C2O)(CCC(=O)C(C)=C)C)C)C)<br>1(C)C)C                   | 0.178895731 |
| 85044013  | Ginsenoside Rs1      | 01C(CO)C(O)C(O)C(OC2OC(COC(=O)C)C(O)C(<br>O)C2O)C1OC1CCC2(C(CCC3(C2CC(O)C2C3(CC<br>C2C(OC2OC(COC3OCC(O)C(O)C3O)C(O)C(O)C2<br>O)(CCC=C(C)C)C)C)C)C1(C)C)C | 0.181315932 |
| 11550001  | Ginsenoside-Rg5      | 01C(CO)C(O)C(O)C(OC2OC(CO)C(O)C(O)C2O)C<br>1OC1CCC2(C(CCC3(C2CC(O)C2C3(CCC2C(=CC<br>C=C(C)C)C)C)C)C)C1(C)C)C                                             | 0.187214052 |
| 73157065  | Ginsenoside Rs2      | 01C(COC(=O)C)C(O)C(O)C(OC2OC(CO)C(O)C(<br>O)C2O)C1OC1CCC2(C(CCC3(C2CC(O)C2C3(CC<br>C2C(OC2OC(COC3OC(CO)C(O)C3O)C(O)C(O)C2<br>O)(CCC=C(C)C)C)C)C)C1(C)C)C | 0.188511535 |
| 85237385  | Ginsenoside Rh5      | 01C(CO)C(O)C(O)C(O)C1OC1C2C(C)(C)C(O)CC<br>C2(C2CC(O)C3C(CCC3C(OC)(CCC=C(C)C)C)(C)<br>C2(C1)C)C                                                          | 0.193396881 |
| 10629247  | Vina-ginsenoside R25 | 01C(CO)C(O)C(O)C(O)C1OC1C2C(C)(C)C(O)CC<br>C2(C2CC(O)C3C(CCC3C(OC3OC(CO)C(O)C(O)C<br>3O)(CCC(=O)C(C)=C)C)(C)C2(C1)C)C                                    | 0.195799324 |

---
